# Supplementary material for: Short-bite PSP-type ligands: coordination chemistry and ligand rearrangement reactions
Source: Royal Society of Chemistry journal article supplement (doi:10.1039/d5cc01739d), 2025-01-01
Supplement: d5cc01739d1.pdf [file d5cc01739d1.pdf]

# Supporting information

## Short-bite PSP-type ligands: coordination chemistry and ligand rearrangement reactions

Franziska Flecken,<sup>a</sup> Toni Grell<sup>b</sup> and Schirin Hanf<sup>a\*</sup>

<sup>a</sup> Institute for Inorganic Chemistry, Karlsruhe Institute of Technology, Engesserstr. 15, 76131 Karlsruhe, Germany, [schirin.hanf@kit.edu](mailto:schirin.hanf@kit.edu)

<sup>b</sup> Dipartimento di Chimica, Università degli Studi di Milano, Via Camillo Golgi 19, 20131 Milano, Italy.

|                                               |    |
|-----------------------------------------------|----|
| 1. Experimental section .....                 | 1  |
| 2. NMR and IR spectroscopic analyses .....    | 8  |
| 3. Single-crystal X-ray crystallography ..... | 25 |
| 4. Structural parameters .....                | 26 |
| 5. Literature comparison of ligands.....      | 28 |
| 6. Catalytic tests.....                       | 29 |
| 7. Computational details .....                | 31 |
| 8. References.....                            | 37 |

## 1. Experimental section

### 1.1 Materials, methods and instruments

All experiments were carried out under Ar atmosphere using Schlenk-techniques and an Ar-filled glove box (MBraun). Toluene, tetrahydrofuran (THF), *n*-pentane and *n*-heptane were dried using a solvent purification system (MBraun SPS-800) and degassed prior to use. THF was further distilled over potassium/benzophenone. Acetonitrile (MeCN) and dichloromethane (DCM) were distilled over CaH<sub>2</sub>. Deuterated solvents were dried over P<sub>2</sub>O<sub>5</sub> (CDCl<sub>3</sub> and CD<sub>2</sub>Cl<sub>2</sub>) or over CaH<sub>2</sub> (C<sub>6</sub>D<sub>6</sub>, D<sub>8</sub>-toluene and CD<sub>3</sub>CN). Before use, deuterated solvents were degassed through three freeze-pump-thaw cycles and stored over molecular sieves (MeCN and CD<sub>3</sub>CN over 3 Å, all other over 4 Å).

NMR spectra were recorded on Bruker Avance III or Avance Neo 400 MHz spectrometers at 298 K. Chemical shifts are described in parts per million (ppm) and are referenced to residual solvent signals of the deuterated solvents. For the distinct assignment of the signals, chemical shifts, coupling patterns and 2D experiments (<sup>1</sup>H–<sup>1</sup>H COSY, <sup>1</sup>H–<sup>13</sup>C HMQC, <sup>1</sup>H–<sup>13</sup>C HMBC) are used. Multiplicities of the NMR signals are abbreviated as s = singlet, d = doublet, t = triplet, dd = doublet of doublets, ddd = doublet of doublets of doublets, dt = doublet of triplets, m = multiplet, br = broad. The NMR data was processed using MestreNova.

Infrared (IR) spectra were conducted using a Bruker Tensor 37 FTIR spectrometer equipped with a room-temperature DLaTGS detector, a diamond ATR (attenuated total reflection) unit, and a nitrogen-flushed measurement chamber in the region of 4000–450 cm<sup>-1</sup>. Signals were divided into vs = very strong, s = strong, m = medium, w = weak and vw = very weak. Data was processed with the program Origin.

Single crystals were measured on a STOE STADIVARI and on a STOE METAL JET D2 diffractometer. The STOE STADIVARI is equipped with an open Eulerian cradle (4-circle) and a DECTRIS PILATUS pixel detector at 100 K with a microfocus molybdenum source (Mo-Kα, λ = 0.71073 Å) using a graphite monochromator as radiation source. The STOE METAL JET D2 contains a EIGER4M Detector with a sealed X-Ray tube (Mo-Kα, λ = 0.71073 Å) and a graded multilayer mirror monochromator. A liquid-gallium-jet anode is utilized as radiation source. The data reduction was conducted with X-Area version 1.73.1.0 (STOE, 2018)<sup>1</sup> using the semi-empirical absorption correction by X-RED with scaling of the reflection intensities by LANA included in X-Area. Structures were solved by means of dual space methods with SHELXT-2015<sup>2</sup> and refinement was performed with SHELXL-2018<sup>3</sup> using the WinGX<sup>4</sup> program suite. Full-matrix least-square routines against F<sup>2</sup> were carried out. Hydrogen atoms were calculated on idealized positions. Pictures were generated with the program DIAMOND<sup>5</sup>. For these thermal ellipsoids are shown with 30% probability and hydrogen atoms as well as co-crystallised solvent molecules are omitted for clarity. CCDC 2375582 (**1**), CCDC 2375583 (**2**),

CCDC 2375585 (**3**), CCDC 2375584 (**4**), and CCDC 2375581 (**5**) contain the supplementary crystallographic data for this paper. These data can and additional information can be obtained free of charge via <https://summary.ccdc.cam.ac.uk/structure-summary-form> (or from the Cambridge Crystallographic Data Centre, 12 Union Road, Cambridge CB2 1EZ, UK; fax: (+44)1223-336-033; or [deposit@ccdc.cam.ac.uk](mailto:deposit@ccdc.cam.ac.uk)).

UV/Vis spectra were recorded using an Ocean FX UV-Vis spectrometer from Ocean Optics. Therefore, solutions with a concentration of  $c = 1 \cdot 10^{-4} \text{ mol L}^{-1}$  were prepared. Data was processed with the program Origin.

The elemental analysis of the samples was conducted using a vario EL cube or a vario MICRO cube (Elementar Analysensysteme GmbH).

Catalytic tests were qualitatively and quantitatively evaluated by means of GC-MS using an Agilent 8860 GC and a 5977B MSD whereby *n*-decane was used as internal standard.

## 1.2 Syntheses

### Tetraphenyl diphosphine sulphide ( $\text{Ph}_2\text{P(=S)-PPh}_2$ , PPS)

PPS was prepared by dissolving diphenyl phosphine sulphide (1 g, 4.582 mmol, 1 eq.) in toluene, adding triethylamine (0.61 g, 0.83 mL, 1.3 eq.) and cooling with an ice bath to 0-5°C. Chlorodiphenylphosphine (1.03 g, 0.84 mL, 4.582 mmol, 1 eq.) diluted in toluene, was added slowly to the solution of diphenyl phosphine sulphide. After stirring overnight, the solution was filtered and the solvent was partially evaporated *in vacuo*. The solution was cooled to -30°C and overnight colourless crystals were grown. The crystals were washed with *n*-pentane and dried *in vacuo* (0.977 g, crystalline yield: 53.0 %).

$^1\text{H}$  NMR (298 K,  $\text{CDCl}_3$ , 400 MHz),  $\delta$  [ppm] = 8.14 (m, 4 H), 7.71 (m, 4 H), 6.95 (m, 12 H)

$^{31}\text{P}\{^1\text{H}\}$  NMR (298 K,  $\text{CD}_2\text{Cl}_2$ , 162 MHz),  $\delta$  [ppm] = 44.3 (d, P=S,  $^2J_{\text{PP}} = 247.3 \text{ Hz}$ ), -13.8 (d,  $\text{PPh}_2$ ,  $^2J_{\text{PP}} = 247.3 \text{ Hz}$ )

### [NiBr<sub>2</sub>(PSP)] (**1**)

NiBr<sub>2</sub> (100.0 mg, 0.46 mmol, 1 eq.) was heated to reflux with the PPS ( $\text{Ph}_2\text{P(=S)-PPh}_2$ ; 184.2 mg, 0.46 mmol, 1 eq.) ligand in acetonitrile (6 mL) for 5 hours. The reaction mixture was filtered, and the solvent was subsequently removed *in vacuo*. Through redissolving the solid residue in DCM and layering with *n*-heptane, 139.8 mg of compound **1** in 49.2% crystalline yield were obtained.

$^1\text{H}$  NMR (298 K,  $\text{CD}_2\text{Cl}_2$ , 400 MHz),  $\delta$  [ppm] = 8.11 (m, 8 H, Ph-H-*ortho*), 7.66 (t, 4 H,  $J_{\text{HH}}$  = 7.6 Hz, Ph-H-*para*); 7.56 (t, 8 H,  $J_{\text{HH}}$  = 7.6 Hz, Ph-H-*meta*)

$^{31}\text{P}\{^1\text{H}\}$  NMR (298 K,  $\text{CD}_2\text{Cl}_2$ , 162 MHz),  $\delta$  [ppm] = -17.5 (s)

$^{13}\text{C}$  NMR (298 K,  $\text{CD}_2\text{Cl}_2$ , 101 MHz),  $\delta$  [ppm] = 134.0 (br, *o*-Ar-C), 133.1 (s, *p*-Ar-C), 129.5 (br, *m*-Ar-C)

ATR-IR ( $\text{cm}^{-1}$ ):  $\tilde{\nu}$  = 1478 (w), 1431(m), 1382(vw), 1330 (vw), 1305 (vw), 1182 (w), 1161 (vw), 1139 (vw), 1088 (m), 1066 (w), 1022 (vw), 995 (w), 970 (vw), 921 (vw), 838 (vw), 754 (w), 740 (s), 710 (w), 694 (m), 682 (vs), 617 (vw), 561 (vs), 534 (w), 507 (vs), 474 (w), 468 (vs), 459 (s), 434 (m)

UV/Vis [dcm, nm ( $\text{mol}^{-1}\text{dm}^3\text{cm}^{-1}$ ):  $\lambda_{\text{max}}$  ( $\epsilon$ ) = 510 (2391), 304 (17069), 277 (21175), 255 (24981)

Elemental analysis calculated (%) for  $\text{C}_{24}\text{H}_{20}\text{Br}_2\text{NiP}_2\text{S} \cdot 0.5 \text{ DCM}$ : C 44.36, H 3.19, S 4.83  
found: C 44.36, H 3.26, S 4.88

### **[NiI<sub>2</sub>(PSP)] (2)**

NiI<sub>2</sub> (100.0 mg, 0.32 mmol, 1 eq.) and PPS (128.8 mg, 0.32 mmol, 1 eq.) were brought to reflux in acetonitrile (6 mL) for 5 hours. The reaction mixture was filtered. After removing the solvent *in vacuo*, redissolving the resulting solid residue in DCM and layering with *n*-heptane, 105.7 mg of single-crystals were obtained in 46.2 % crystalline yield.

$^1\text{H}$  NMR (298 K,  $\text{CD}_2\text{Cl}_2$ , 400 MHz),  $\delta$  [ppm] = 8.10 (m, 8 H, *o*-Ph-H), 7.64 (t, 4 H,  $J_{\text{HH}}$  = 7.5 Hz, *p*-Ph-H); 7.56 (t, 8 H,  $J_{\text{HH}}$  = 7.5 Hz, *m*-Ph-H)

$^{31}\text{P}\{^1\text{H}\}$  NMR (298 K,  $\text{CD}_2\text{Cl}_2$ , 162 MHz),  $\delta$  [ppm] = -14.5 (s)

$^{13}\text{C}$  NMR (298 K,  $\text{CD}_2\text{Cl}_2$ , 101 MHz),  $\delta$  [ppm] = 134.3 (m, *o*-Ar-C), 132.9 (s, *p*-Ar-C), 129.3 (m, *m*-Ar-C)

ATR-IR ( $\text{cm}^{-1}$ ):  $\tilde{\nu}$  = 1478 (w), 1431 (m), 1383 (vw), 1330 (vw), 1303 (vw), 1178 (w), 1161 (vw), 1141 (vw), 1088 (m), 1066 (vw), 1022 (vw), 995 (w), 970 (vw), 923 (vw), 835 (vw), 754 (w), 739 (s), 710 (w), 694 (m), 685 (vs), 615 (vw), 557 (vs), 528 (m), 505 (vs), 474 (w), 464 (s), 453 (s), 434 (m)

UV/Vis (dcm, nm [mol<sup>-1</sup>dm<sup>3</sup>cm<sup>-1</sup>]):  $\lambda_{\max}$  ( $\epsilon$ ) = 564 (2297), 387 (3347), 303 (18242), 250 (24786)

Elemental analysis calculated (%) for C<sub>24</sub>H<sub>20</sub>I<sub>2</sub>NiP<sub>2</sub>S: C 40.32, H 2.82, S 4.48 found: C 40.22, H 3.03, S 4.00

### **[Ni<sub>2</sub>( $\mu_2$ -Ph<sub>2</sub>P)( $\mu_2$ -Ph<sub>2</sub>PS)(Ph<sub>2</sub>PSS)<sub>2</sub>] (3)**

**3** was obtained through the conversion of NiCl<sub>2</sub> (70.0 mg, 0.54 mmol, 1 eq.) and PPS (217.3 mg, 0.54 mmol, 1 eq.) under reflux conditions in acetonitrile (6 mL). After 5 h of reaction, the mixture was filtered and the solvent evaporated *in vacuo*. 17.0 mg of dark-brown crystals suitable for SXRD were obtained by dissolving the solid residue in DCM and layering the solution with *n*-pentane in a crystalline yield of 6 %.

<sup>1</sup>H NMR (298 K, CD<sub>2</sub>Cl<sub>2</sub>, 400 MHz),  $\delta$  [ppm] = 8.06–7.93 (m, 8 H, *o*-Ph<sub>2</sub>PSS<sup>-</sup>), 7.70–7.64 (m, 2 H, *p*-Ph<sub>2</sub>PS<sup>-</sup>), 7.64–7.58 (m, 4 H, *o*-Ph<sub>2</sub>P<sup>-</sup>), 7.58–7.54 (m, 2 H, *p*-Ph<sub>2</sub>P<sup>-</sup>), 7.54–7.48 (m, 4 H, *m*-Ph<sub>2</sub>P<sup>-</sup>), 7.48–7.41 (m, 8 H, *o,m*-Ph<sub>2</sub>PS<sup>-</sup>), 7.41–7.28 (m, 8 H, *m*-Ph<sub>2</sub>PSS<sup>-</sup>), 7.27–7.18 (m, 4 H, *p*-Ph<sub>2</sub>PSS<sup>-</sup>)

<sup>31</sup>P{<sup>1</sup>H} NMR (298 K, CD<sub>2</sub>Cl<sub>2</sub>, 162 MHz),  $\delta$  [ppm] = 92.0 (dt, 1 P<sub>b</sub>, Ph<sub>2</sub>PS<sup>-</sup>, <sup>2</sup>J<sub>PP</sub> = 49.0 Hz, <sup>3</sup>J<sub>PP</sub> = 3.6 Hz), 72.7 (s, 1 P<sub>d</sub>, Ph<sub>2</sub>PSS<sup>-</sup>), 72.0 (t, 1 P<sub>a</sub>, Ph<sub>2</sub>PSS<sup>-</sup>, <sup>3</sup>J<sub>PP</sub> = 3.6 Hz), 60.4 (dd, 1 P<sub>c</sub>, Ph<sub>2</sub>P<sup>-</sup>, <sup>2</sup>J<sub>PP</sub> = 49.0 Hz, <sup>3</sup>J<sub>PP</sub> = 3.6 Hz); naming scheme: Figure S21

<sup>13</sup>C NMR (298 K, CD<sub>2</sub>Cl<sub>2</sub>, 101 MHz),  $\delta$  [ppm] = 135.8 (br), 134.5 (d), 132.8 (d), 131.9 (dd), 130.1 (br), 129.8 (dd), 128.5 (dd), 128.5 (s), 128.0 (d), 127.4 (d)

ATR-IR (cm<sup>-1</sup>):  $\tilde{\nu}$  = 3043 (vw), 1961 (vw), 1877 (vw), 1810 (w), 1774 (w), 1697 (w), 1653 (w), 1616 (vw), 1577 (w), 1561 (w), 1540 (w), 1523 (vw), 1508 (vw), 1475 (m), 1432 (m), 1395 (w), 1328 (w), 1305 (m), 1264 (w), 1179 (m), 1158 (w), 1094 (s), 1067 (m), 1026 (m), 994 (m), 972 (w), 920 (w), 847 (w), 741 (s), 706 (s), 687 (vs), 628 (m), 607 (m), 571 (vs), 520 (m), 488 (s), 475 (s)

Elemental analysis calculated (%) for C<sub>48</sub>H<sub>40</sub>Ni<sub>2</sub>P<sub>4</sub>S<sub>5</sub>: C 56.61, H 3.96, S 15.74 found: C 56.24, H 4.03, S 15.97

### **[Ni<sub>3</sub>( $\mu_2$ -Ph<sub>2</sub>P)<sub>2</sub>( $\mu_2$ -Ph<sub>2</sub>PS)<sub>2</sub>(Ph<sub>2</sub>PS)<sub>2</sub>] (4)**

[Ni(COD)<sub>2</sub>] (50.0 mg, 0.18 mmol, 1 eq.) was reacted with PPS (146.3 mg, 0.36 mmol, 2 eq.) in DCM (6 mL) at room temperature. After stirring overnight, the reaction solution was filtered and layered with *n*-pentane. After 2 days, dark red crystals suitable for single crystal XRD were obtained in 27 % crystalline yield (23.2 mg).

<sup>1</sup>H NMR (298 K, CDCl<sub>3</sub>, 400 MHz),  $\delta$  [ppm] = 8.00–7.73 (m, 4 H, *p*-Ph<sub>2</sub>PS<sup>-</sup><sub>intern</sub>), 7.72–7.57 (m, 4 H, *p*-Ph<sub>2</sub>P<sup>-</sup>), 7.56–7.44 (m, 4 H, *p*-Ph<sub>2</sub>PS<sup>-</sup><sub>terminal</sub>), 7.42–7.27 (m, 8 H, *o*-Ph<sub>2</sub>PS<sup>-</sup><sub>intern</sub>), 7.28–6.78 (m, 40 H: 8 H *m*-Ph<sub>2</sub>PS<sup>-</sup><sub>intern</sub>, 8 H *m*-Ph<sub>2</sub>P<sup>-</sup>, 8 H *o*-Ph<sub>2</sub>P<sup>-</sup>, 8 H *m*-Ph<sub>2</sub>PS<sup>-</sup><sub>terminal</sub>, 8 H *o*-Ph<sub>2</sub>PS<sup>-</sup><sub>terminal</sub>)

<sup>31</sup>P{<sup>1</sup>H} NMR (298 K, CDCl<sub>3</sub>, 162 MHz),  $\delta$  [ppm] = 99.0 (br, 2 P<sub>c</sub>, Ph<sub>2</sub>PS<sup>-</sup><sub>intern</sub>), 40.2 (br, 2 P<sub>b</sub>, Ph<sub>2</sub>P<sup>-</sup>), 29.6 (br, 1 P<sub>a</sub>, Ph<sub>2</sub>PS<sup>-</sup><sub>terminal</sub>), 22.5 (2 m, 1 P<sub>a</sub>, Ph<sub>2</sub>PS<sup>-</sup><sub>terminal</sub>); naming scheme: Figure S21

<sup>13</sup>C NMR (298 K, CDCl<sub>3</sub>, 101 MHz),  $\delta$  [ppm] = 135.0 (br), 133.9 (br), 133.1–132.3 (br), 128.5 (br), 128.4 (br), 127.1 (br)

Comment on the broadened NMR signals of **4**: The broadening of the NMR signals stems from an increased paramagnetic contribution when the sample is brought into solution. This is due to an equilibrium between the diamagnetic square planar complex **4**, as identified by single crystal XRD, and the paramagnetic tetrahedral analogue. A similar behaviour has been reported before for other Ni(II) complexes, as described in several reviews.<sup>6-8</sup> Kläui and co-workers, for example, investigated a phosphine sulphide stabilised dinuclear Ni(II) complex, namely [(C<sub>5</sub>H<sub>5</sub>)Ni{P(S)R<sub>2</sub>}<sub>2</sub>Ni(C<sub>5</sub>H<sub>5</sub>)], which showed a spin-crossover based on geometry changes within the complex.<sup>9</sup> The authors attributed this behaviour to the strong  $\pi$ -donor character of the sulphur atoms in the phosphine sulfide, which is maximized when the sulphur adopts a nearly planar geometry. For **4**, it can be assumed that mainly the outer nickel atoms are affected by this anomalous behaviour, which are stabilized by terminal Ph<sub>2</sub>PS<sup>-</sup> ligands, since they show the highest deviation from a square-planar coordination (Table S 4).

ATR-IR (cm<sup>-1</sup>):  $\tilde{\nu}$  = 3068 (w), 3049 (w), 1953 (vw), 1882 (vw), 1805 (w), 1772 (vw), 1699 (w), 1650 (w), 1616 (w), 1580 (w), 1558 (w), 1539 (w), 1520 (vw), 1506 (vw), 1475 (m), 1432 (s), 1395 (w), 1323 (w), 1304 (m), 1267 (m), 1243 (m), 1182 (m), 1155 (m), 1128 (m), 1089 (s),

1066 (m), 1026 (m), 997 (m), 968 (w), 918 (w), 844 (w), 736 (s), 687 (vs), 617 (m), 582 (m), 557 (s), 516 (m), 498 (s), 486 (vs), 473 (s)

Elemental analysis calculated (%) for  $C_{72}H_{60}Ni_3P_6S_4$ : C 61.1, H 4.27, S 9.06 found: C 60.63, H 4.40, S 8.51

### **[Ni<sub>2</sub>(μ<sub>2</sub>-Ph<sub>2</sub>P)(μ<sub>2</sub>-Ph<sub>2</sub>PS)(Ph<sub>2</sub>PS)(Ph<sub>2</sub>PSS)] (5)**

[Ni(COD)<sub>2</sub>] (50.0 mg, 0.18 mmol, 1 eq.) and KPhPh<sub>2</sub> (93.2 mg, 0.36 mmol, 2 eq.) were dissolved in toluene (6 mL) at room temperature. ClPPH<sub>2</sub> (80.2 mg, 67 μL, 0.36 mmol, 2 eq.) was added and stirred overnight. The reaction mixture was filtered and layered with *n*-pentane affording dark brown crystals in 15 % crystalline yield (13.3 mg).

<sup>1</sup>H NMR (298 K, CD<sub>2</sub>Cl<sub>2</sub>, 400 MHz), δ [ppm] = 8.08–7.97 (m, 4 H, *o*-Ph<sub>2</sub>PSS<sup>-</sup>), 7.68–7.57 (m, 4 H, *o*-Ph<sub>2</sub>PS<sup>-intern</sup>), 7.57–7.35 (m, 18 H: 4 H, *m*-Ph<sub>2</sub>PSS<sup>-</sup>, 2 H, *p*-Ph<sub>2</sub>PSS<sup>-</sup>, 4 H, *m*-Ph<sub>2</sub>PS<sup>-intern</sup>, 2 H, *p*-Ph<sub>2</sub>PSS<sup>-</sup>, 2 H, *p*-Ph<sub>2</sub>P<sup>-</sup>, 4 H, *m*-Ph<sub>2</sub>PS<sup>-terminal</sup>) 7.30–7.18 (m, 4 H, *o*-Ph<sub>2</sub>PS<sup>-terminal</sup>), 7.18–7.09 (m, 4 H, *m*-Ph<sub>2</sub>P<sup>-</sup>), 7.03–6.96 (m, 2 H, *p*-Ph<sub>2</sub>PS<sup>-terminal</sup>), 6.96–6.85 (m, 4 H, *o*-Ph<sub>2</sub>P<sup>-</sup>)

<sup>31</sup>P{<sup>1</sup>H} NMR (298 K, CD<sub>2</sub>Cl<sub>2</sub>, 162 MHz), δ [ppm] = 90.1 (ddd, 1 P<sub>b</sub>, Ph<sub>2</sub>PS<sup>-intern</sup>, <sup>2</sup>J<sub>PP</sub> = 42.9 Hz, <sup>3</sup>J<sub>PP</sub> = 6.7 Hz, <sup>3</sup>J<sub>PP</sub> = 3.3 Hz), 73.0 (t, 1 P<sub>a</sub>, Ph<sub>2</sub>PSS<sup>-</sup>, <sup>3</sup>J<sub>PP</sub> = 3.3 Hz), 56.3 (ddd, 1 P<sub>c</sub>, Ph<sub>2</sub>P<sup>-</sup>, <sup>2</sup>J<sub>PP</sub> = 42.9 Hz, <sup>2</sup>J<sub>PP</sub> = 31.0 Hz, <sup>3</sup>J<sub>PP</sub> = 3.3 Hz), 31.0 (dd, 1 P<sub>d</sub>, Ph<sub>2</sub>PS<sup>-terminal</sup>, <sup>2</sup>J<sub>PP</sub> = 31.0 Hz, <sup>3</sup>J<sub>PP</sub> = 6.7 Hz); naming scheme: Figure S21

<sup>13</sup>C NMR (298 K, CD<sub>2</sub>Cl<sub>2</sub>, 101 MHz), δ [ppm] = 134.3 (d), 133.4–133.0 (m), 132.2 (br), 131.2 (br), 130.2 (d), 128.8 (t), 128.7 (br), 128.4 (br), 127.7 (br), 127.6 (br)

ATR-IR (cm<sup>-1</sup>):  $\tilde{\nu}$  = 3068 (vw), 3049 (vw), 1801 (vw), 1770 (vw), 1699 (vw), 1681 (vw), 1648 (vw), 1581 (w), 1558 (vw), 1539 (vw), 1523 (vw), 1506 (vw), 1475 (w), 1433 (m), 1389 (vw), 1327 (vw), 1306 (w), 1273 (vw), 1182 (w), 1157 (w), 1093 (m), 1068 (w), 1026 (w), 997 (w), 970 (vw), 919 (vw), 847 (vw), 741 (s), 689 (vs), 635 (vw), 619 (vw), 577 (m), 559 (s), 517 (m), 488 (vs)

Elemental analysis calculated (%) for  $C_{48}H_{40}Ni_2P_4S_4 \cdot 0.7$  toluene: C 60.46, H 4.37, S 12.2 found: C 60.45, H 4.81, S 11.76

### **1.3 Catalytic tests**

All catalytic tests have been conducted under Argon atmosphere in Young-NMR tubes at room temperature. All catalytic tests were carried out with **1**, **2** and simultaneously with the reference catalyst [NiBr<sub>2</sub>(dppe)]. The substrates (aryl halide, 0.1 mmol) and Grignard reagent (1.0 eq., 0.1 mmol), catalyst (5.0 mol%), and the internal standard *n*-decane (20 μL) were dissolved in the solvent (0.5 mL; THF, benzene or toluene). For C(*sp*<sup>2</sup>)-C(*sp*<sup>3</sup>) couplings, 10 mol% of the catalysts were used. During the addition of the reagents, the reaction mixture was cooled down to 0–5°C and the mixture was allowed to slowly reach room temperature overnight. After completion of the reaction time (20 h if not noted otherwise), the reaction mixture was filtered and analysed using GC-MS (100 μL sample in 1 mL EtOH).



## 2. NMR and IR spectroscopic analyses

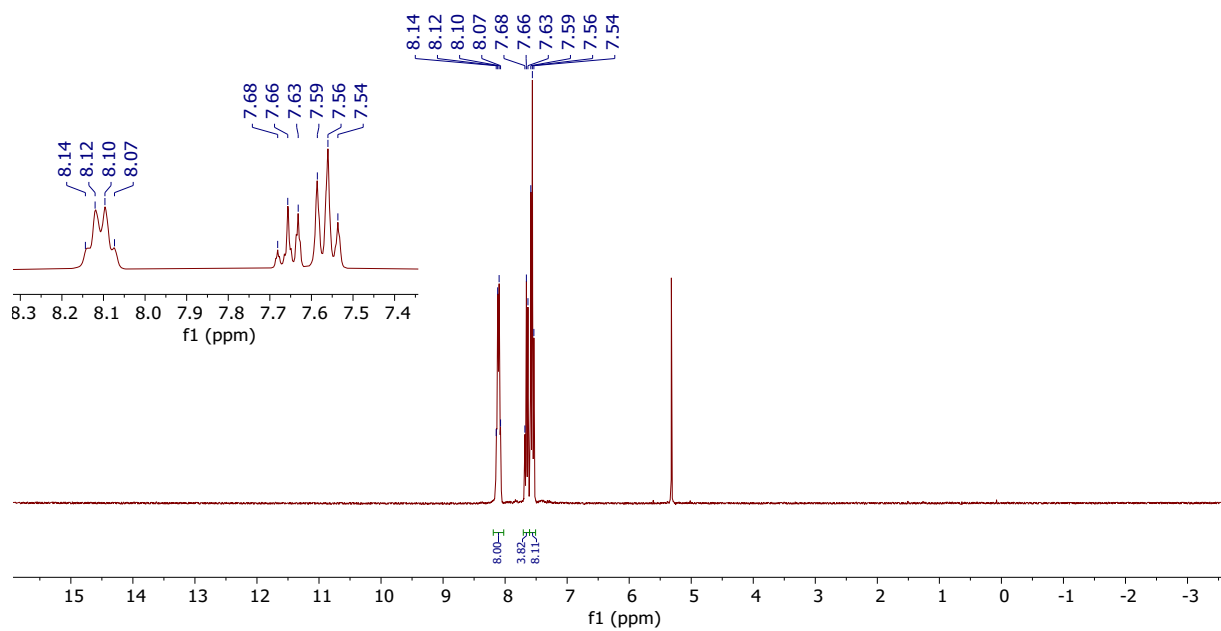

Figure S 1.  $^1\text{H}$  NMR (298 K,  $\text{CD}_2\text{Cl}_2$ , 400 MHz) spectrum of  $[\text{NiBr}_2(\text{PSP})]$  (1).

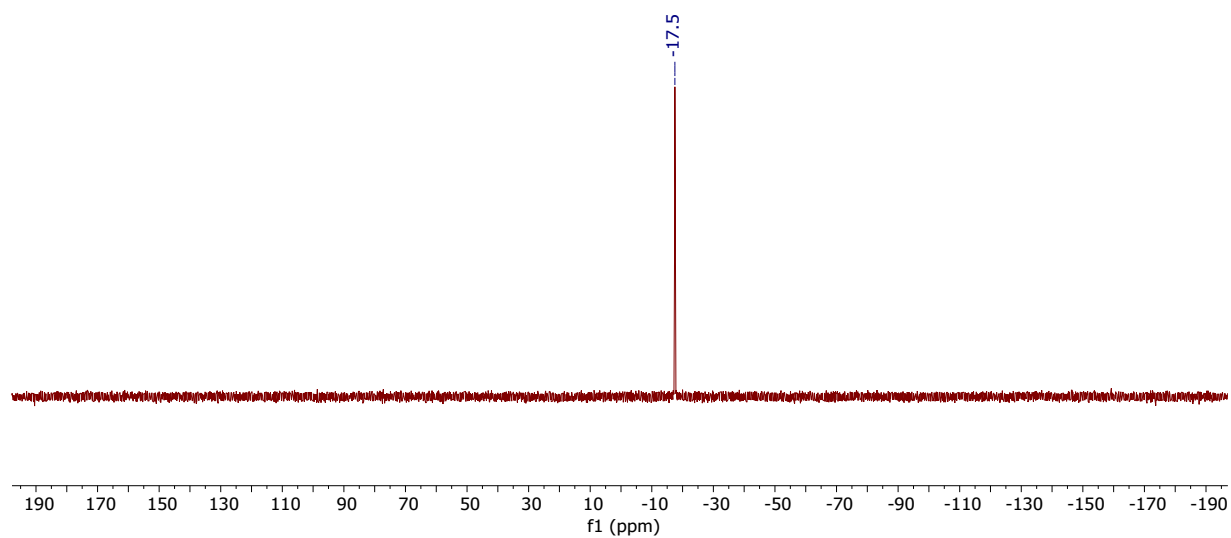

**Figure S 2.**  $^{31}\text{P}\{^1\text{H}\}$  NMR (298 K,  $\text{CD}_2\text{Cl}_2$ , 162 MHz) spectrum of  $[\text{NiBr}_2(\text{PSP})]$  (1).

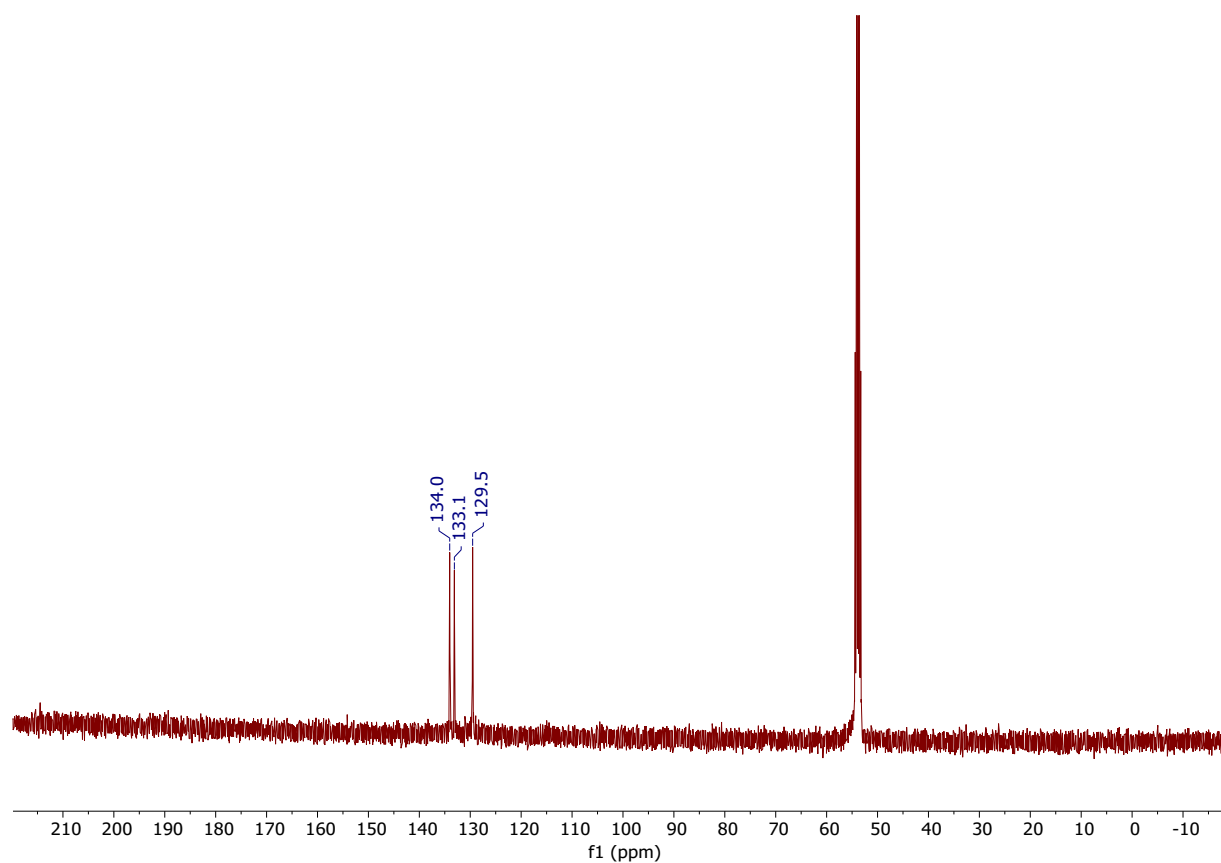

**Figure S 3.**  $^{13}\text{C}$  NMR (298 K,  $\text{CD}_2\text{Cl}_2$ , 101 MHz) spectrum of  $[\text{NiBr}_2(\text{PSP})]$  (1).

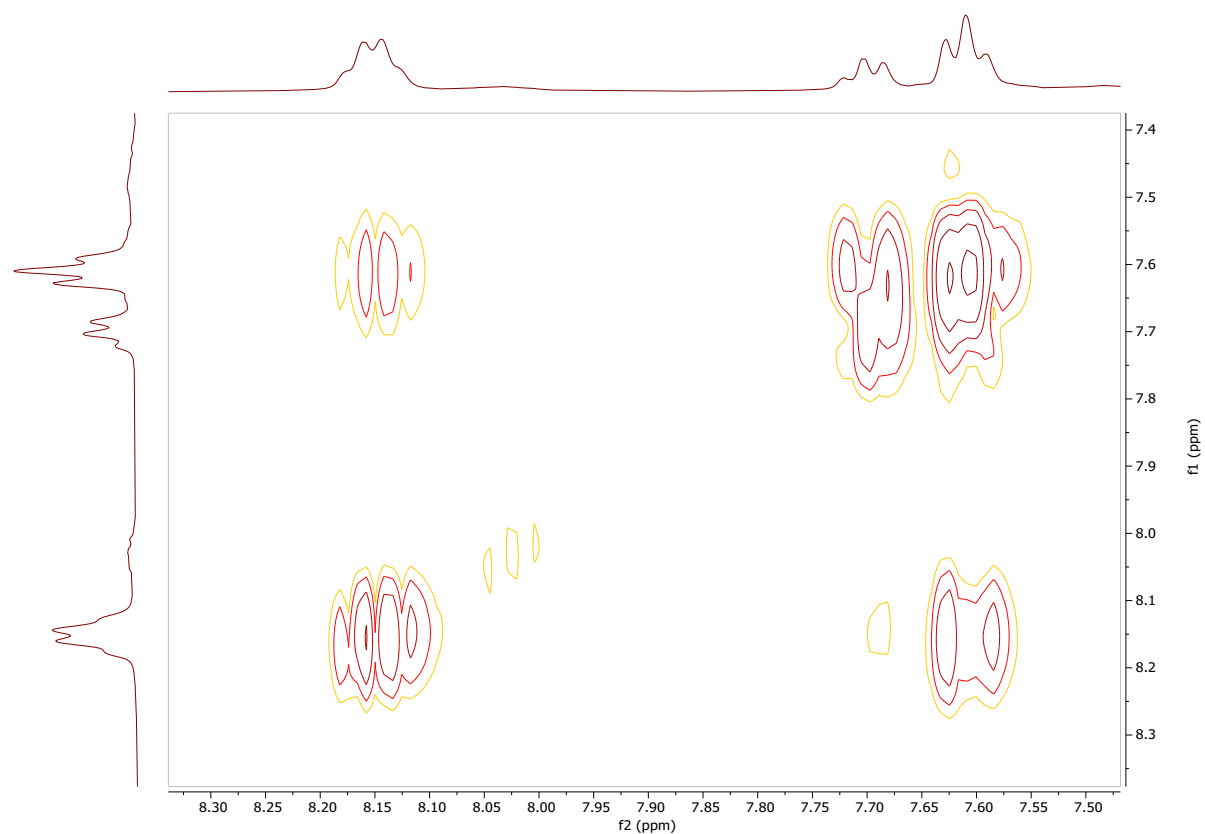

**Figure S 4:**  $^1\text{H}$ - $^1\text{H}$  COSY NMR (298 K,  $\text{CD}_2\text{Cl}_2$ , 400 MHz) spectrum of  $[\text{NiBr}_2(\text{PSP})]$  (**1**).

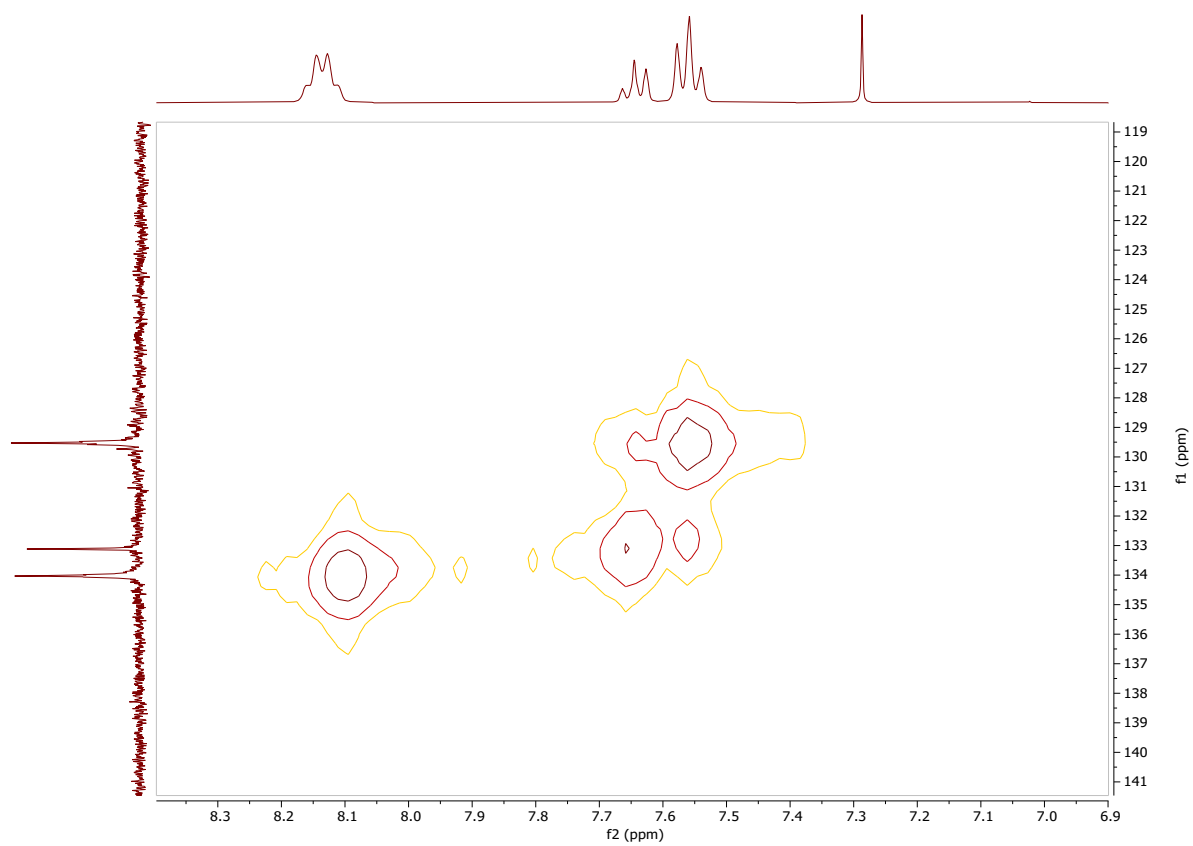

**Figure S 5.**  $^1\text{H}$ - $^{13}\text{C}$  HMQC NMR (298 K,  $\text{CD}_2\text{Cl}_2$ , 400 MHz, 101 MHz) spectrum of  $[\text{NiBr}_2(\text{PSP})]$  (1).

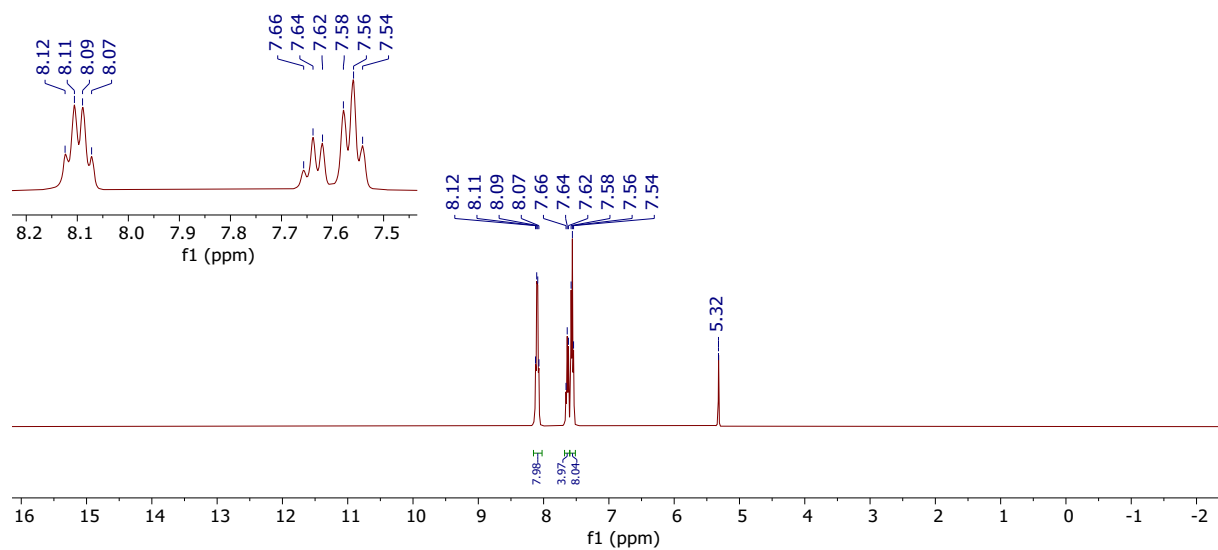

Figure S 6. <sup>1</sup>H NMR (298 K, CD<sub>2</sub>Cl<sub>2</sub>, 400 MHz) spectrum of [NiI<sub>2</sub>(PSP)] (2).

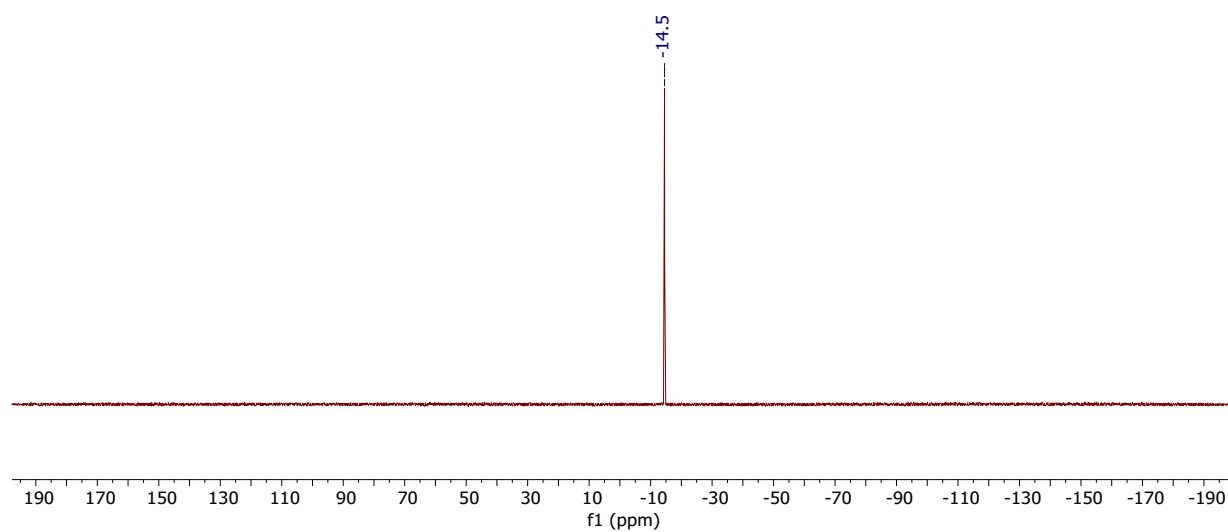

Figure S 7. <sup>31</sup>P{<sup>1</sup>H} NMR (298 K, CD<sub>2</sub>Cl<sub>2</sub>, 162 MHz) spectrum of [NiI<sub>2</sub>(PSP)] (2).

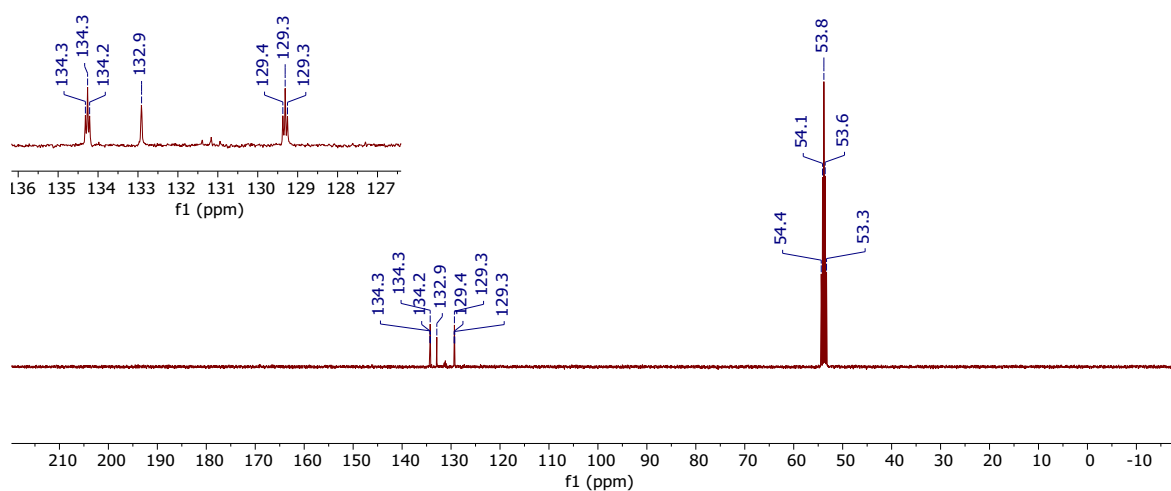

Figure S 8. <sup>13</sup>C NMR (298 K, CD<sub>2</sub>Cl<sub>2</sub>, 101 MHz) spectrum of [NiI<sub>2</sub>(PSP)] (2).

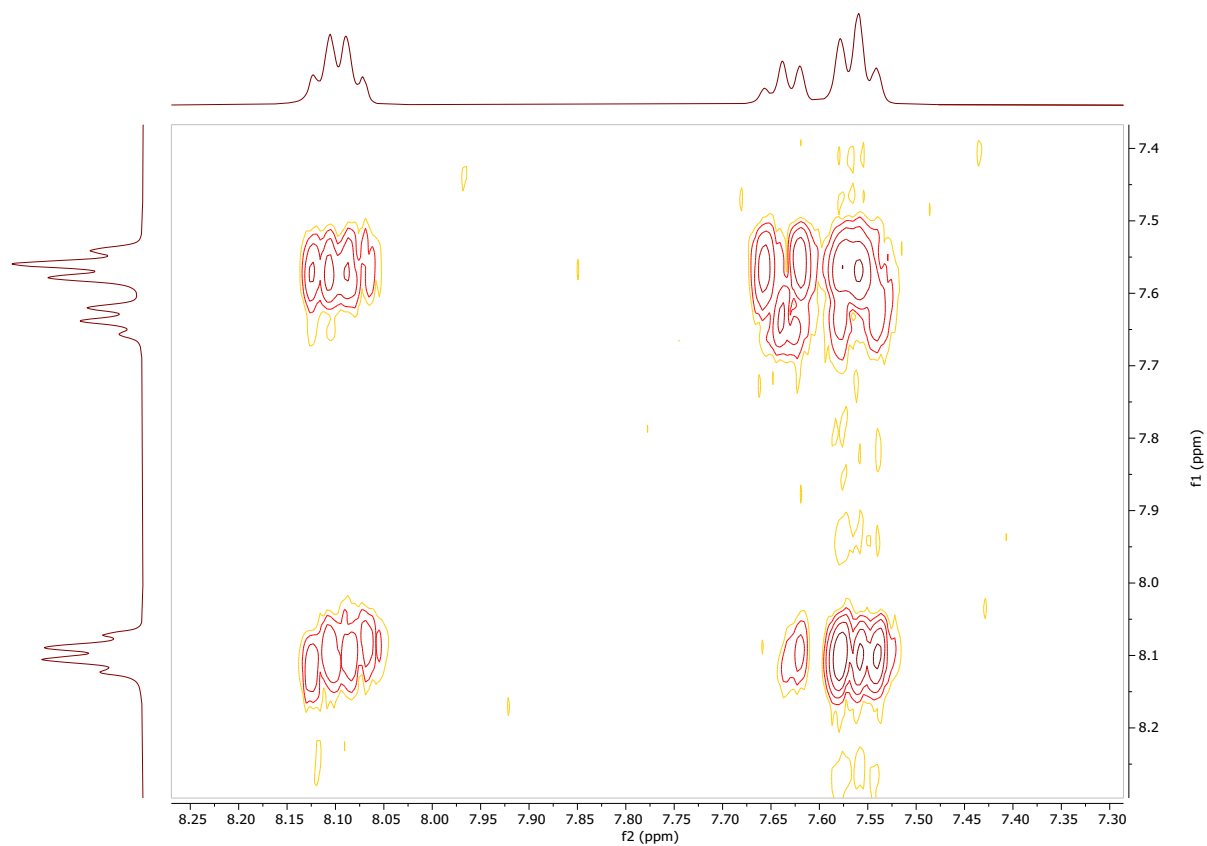

Figure S 9. <sup>1</sup>H-<sup>1</sup>H COSY NMR (298 K, CD<sub>2</sub>Cl<sub>2</sub>, 400 MHz) spectrum of [NiI<sub>2</sub>(PSP)] (2).

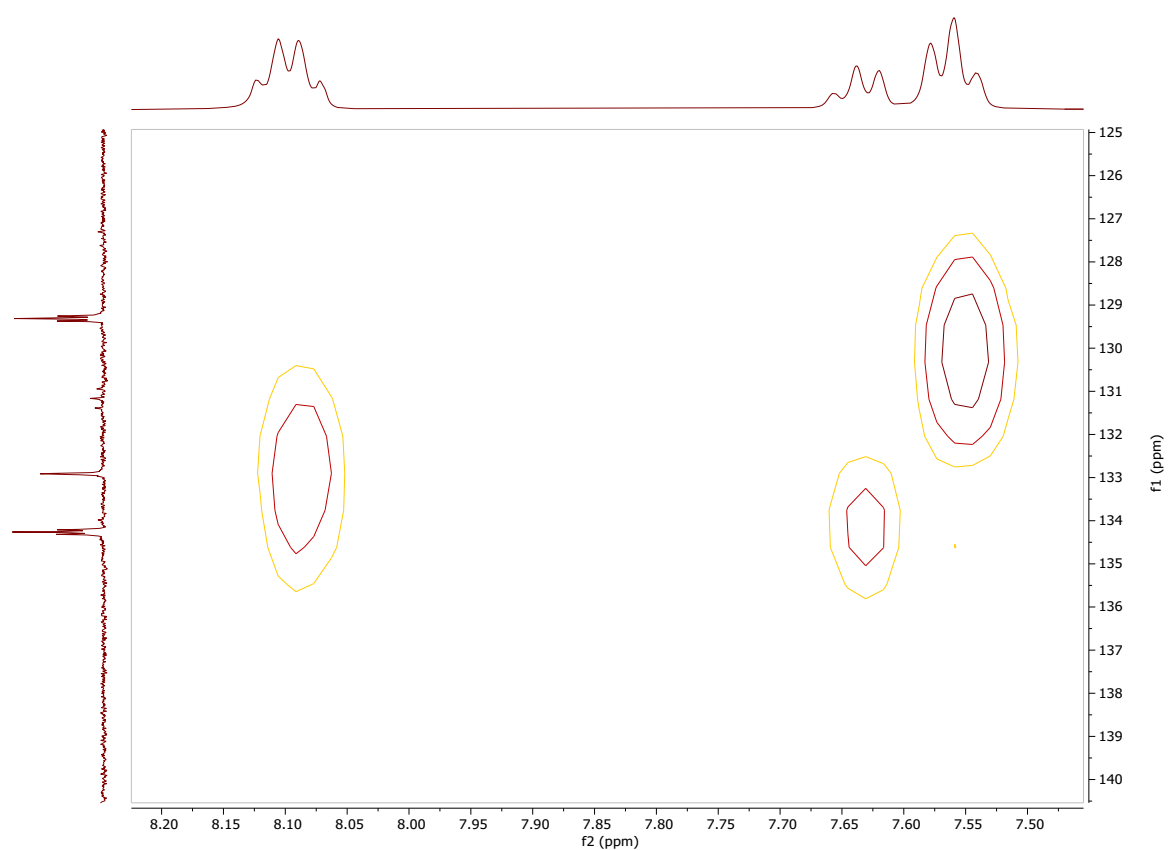

**Figure S 10.** HMQC NMR (298 K,  $\text{CD}_2\text{Cl}_2$ , 400 MHz, 101 MHz) spectrum of  $[\text{NiI}_2(\text{PSP})]$  (2).

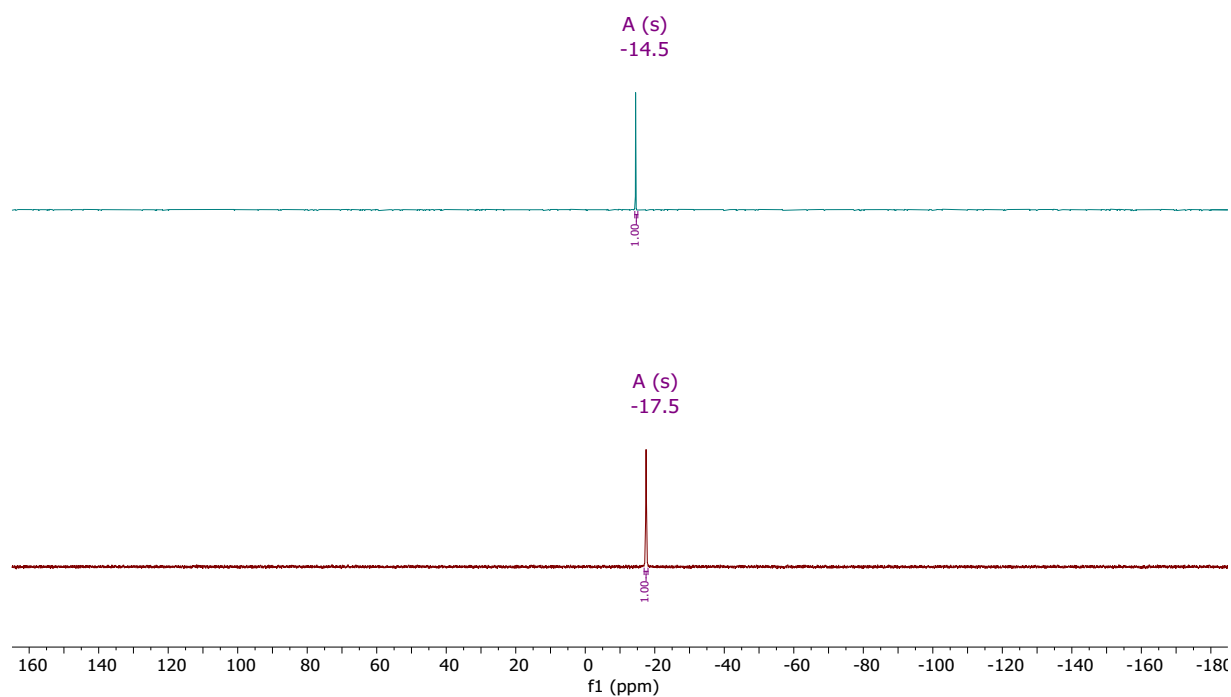

**Figure S 11.**  $^{31}\text{P}\{^1\text{H}\}$  NMR (298 K,  $\text{CD}_2\text{Cl}_2$ , 162 MHz) spectra of compounds **1** and **2** in solution after UV light (365 nm) radiation overnight. No formation of multinuclear compounds, such as **3-5**, or any other change of **1** and **2** can be observed.



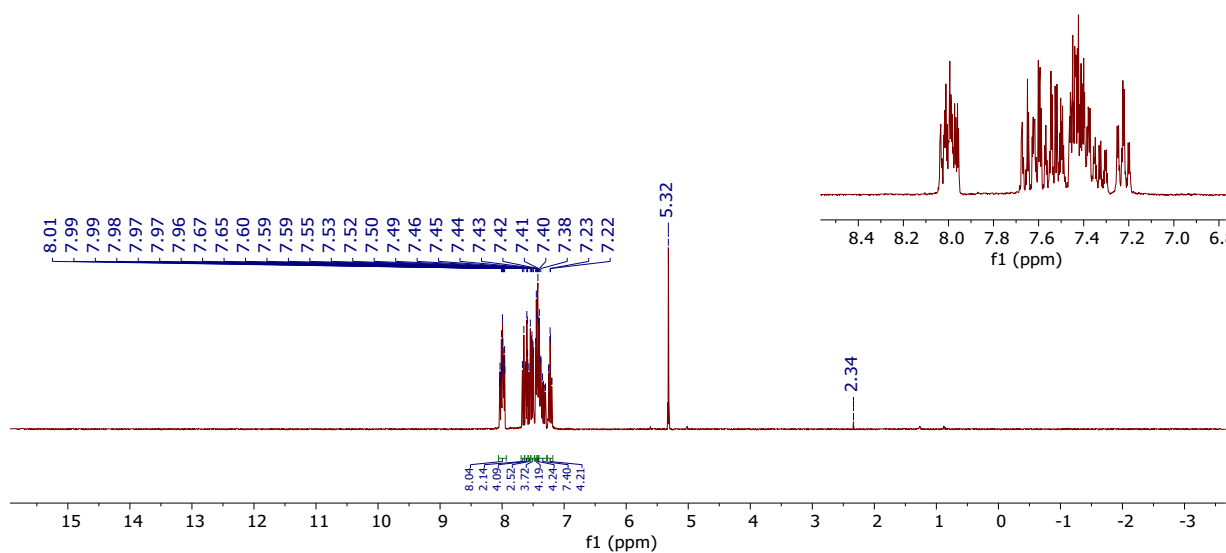

Figure S 12. <sup>1</sup>H NMR (298 K, CD<sub>2</sub>Cl<sub>2</sub>, 400 MHz) spectrum of 3.

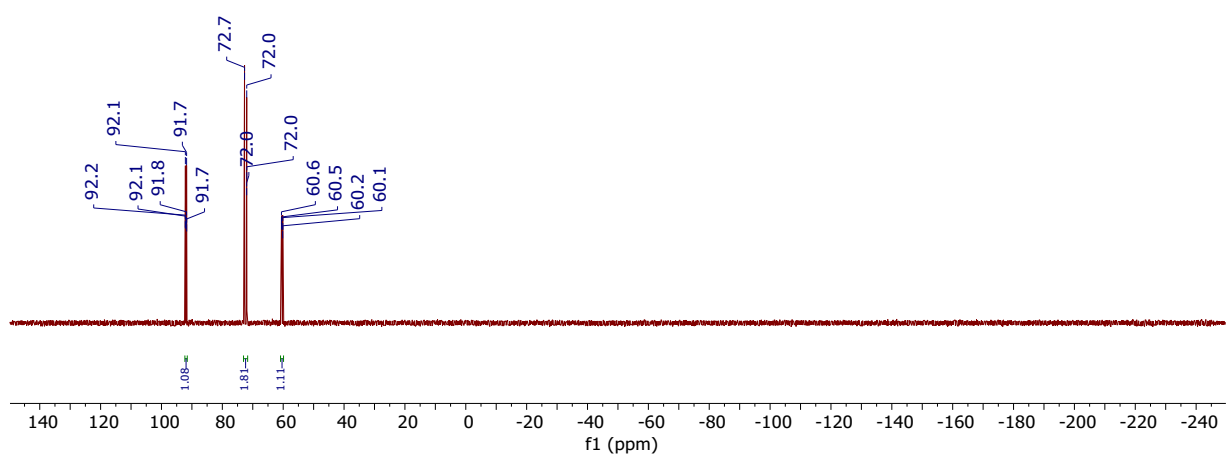

Figure S 13. <sup>31</sup>P{<sup>1</sup>H} NMR (298 K, CD<sub>2</sub>Cl<sub>2</sub>, 162 MHz) spectrum of 3.

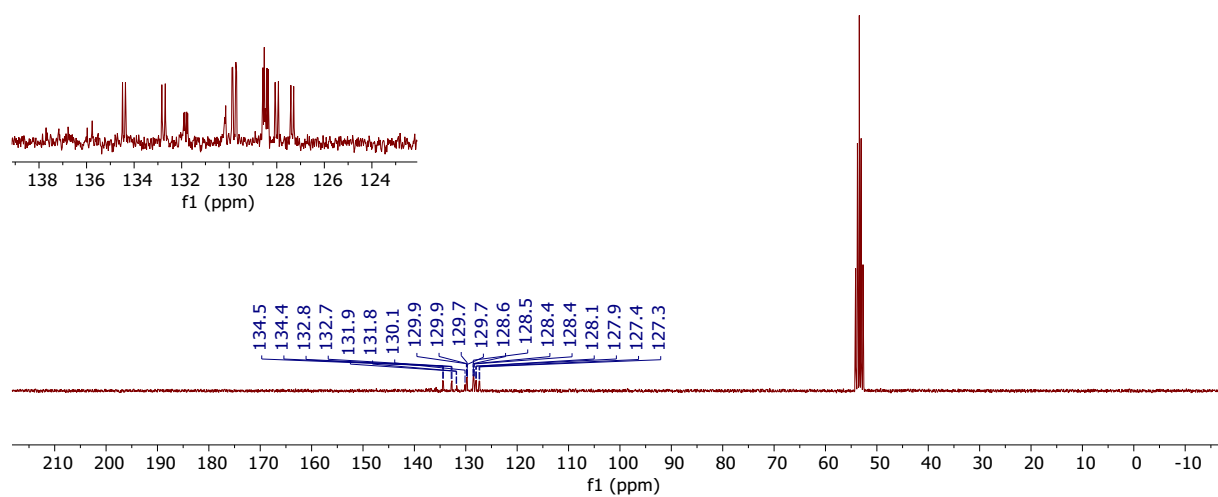

**Figure S 14.**  $^{13}\text{C}$  NMR (298 K,  $\text{CD}_2\text{Cl}_2$ , 101 MHz) spectrum of 3.

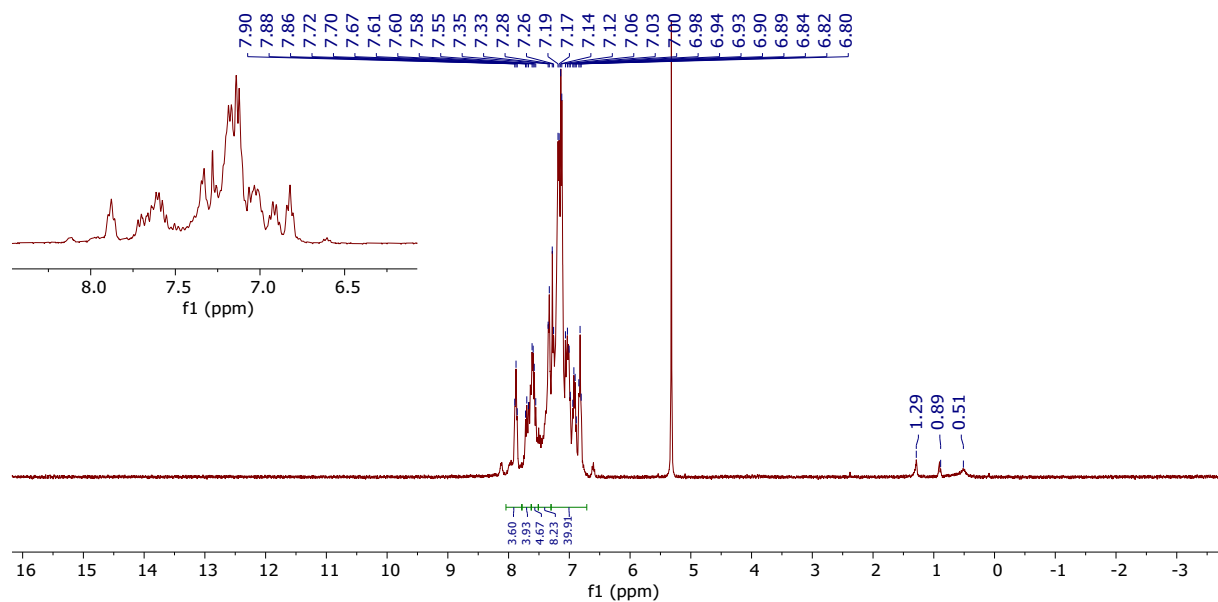

Figure S 15. <sup>1</sup>H NMR (298 K, CDCl<sub>3</sub>, 400 MHz) spectrum of 4. Signals at 1.29 and 0.89 are caused by residual *n*-pentane.

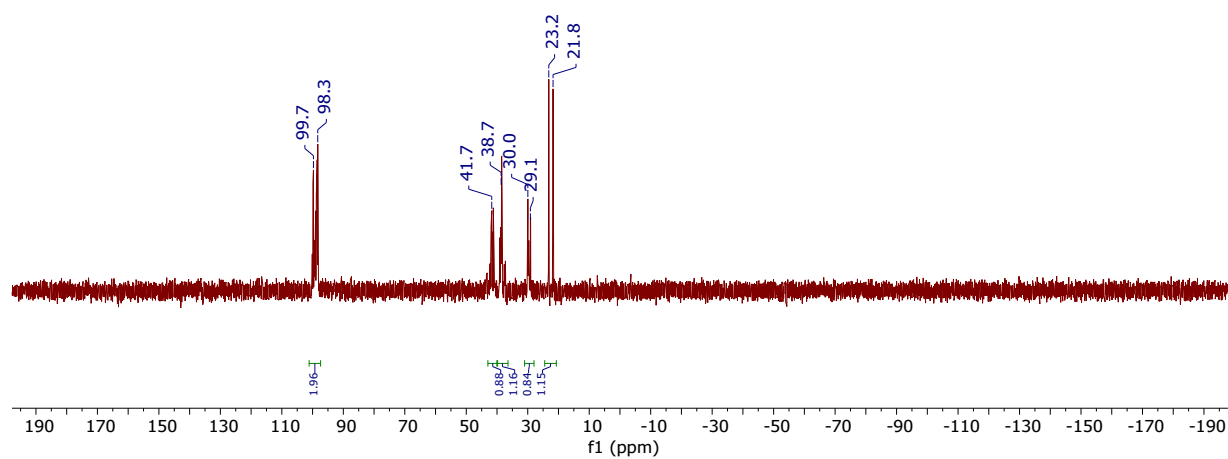

Figure S 16.  $^{31}\text{P}\{^1\text{H}\}$  NMR (298 K,  $\text{CDCl}_3$ , 162 MHz) spectrum of 4.

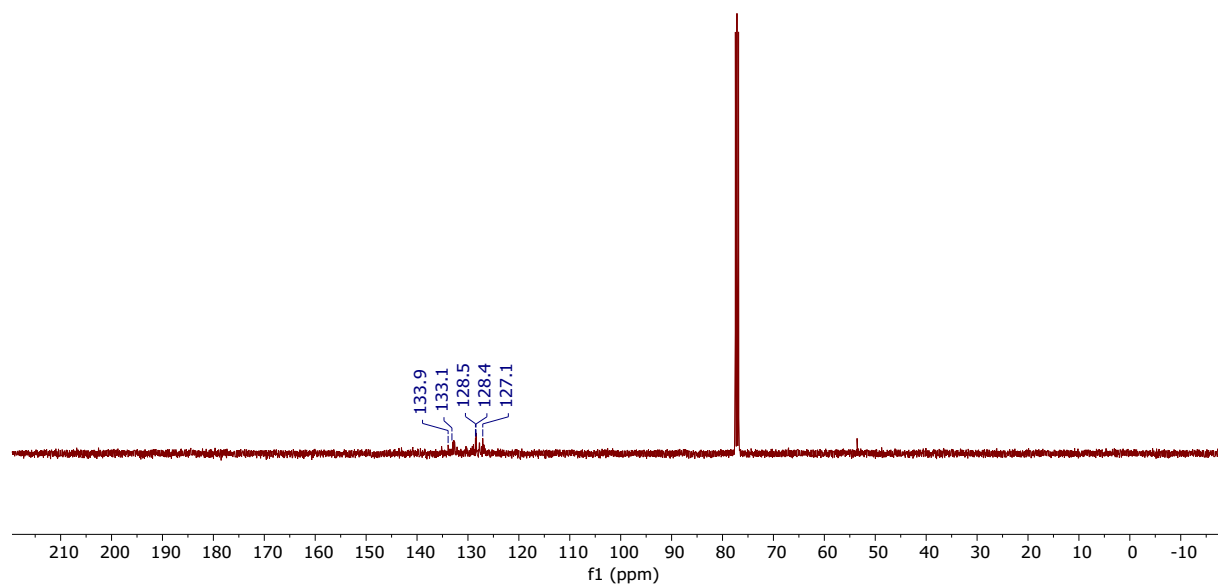

Figure S 17.  $^{13}\text{C}$  NMR (298 K,  $\text{CDCl}_3$ , 101 MHz) spectrum of 4.

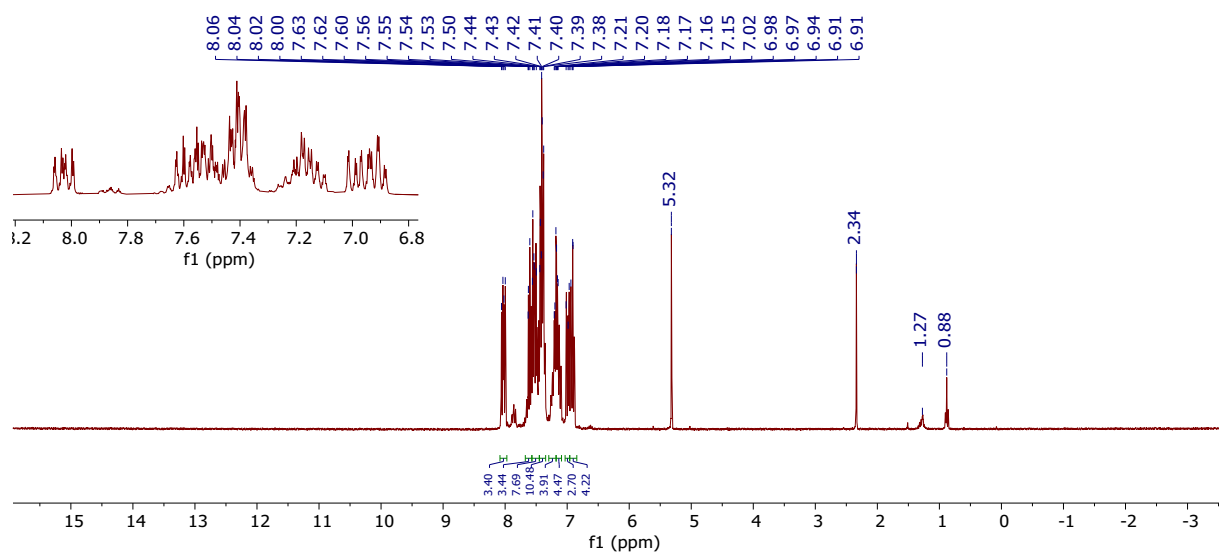

**Figure S 18.**  $^1\text{H}$  NMR (298 K,  $\text{CD}_2\text{Cl}_2$ , 400 MHz) spectrum of 5. Remaining solvent residues of toluene and pentane are visible, as found in the solid-state structure of 5.

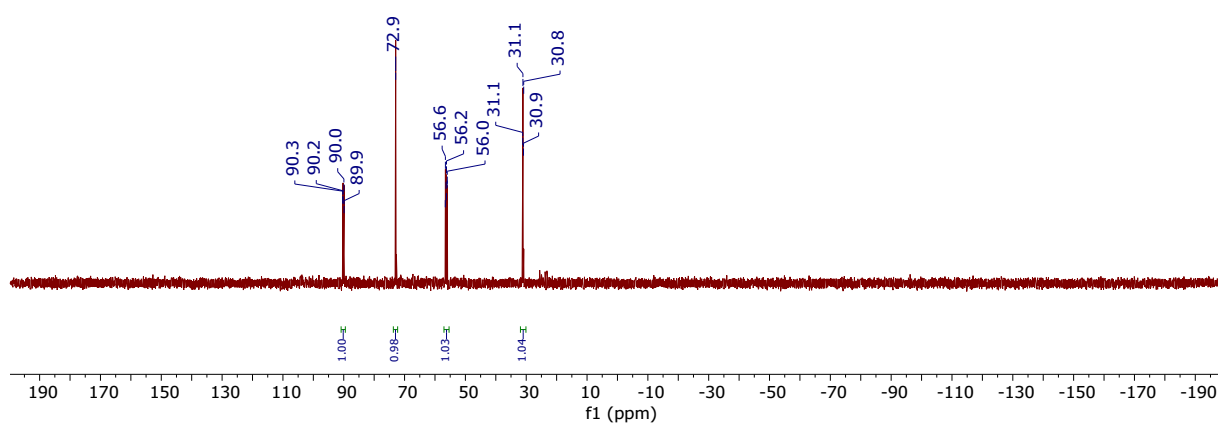

Figure S 19.  $^{31}\text{P}\{^1\text{H}\}$  NMR (298 K,  $\text{CD}_2\text{Cl}_2$ , 162 MHz) spectrum of 5.

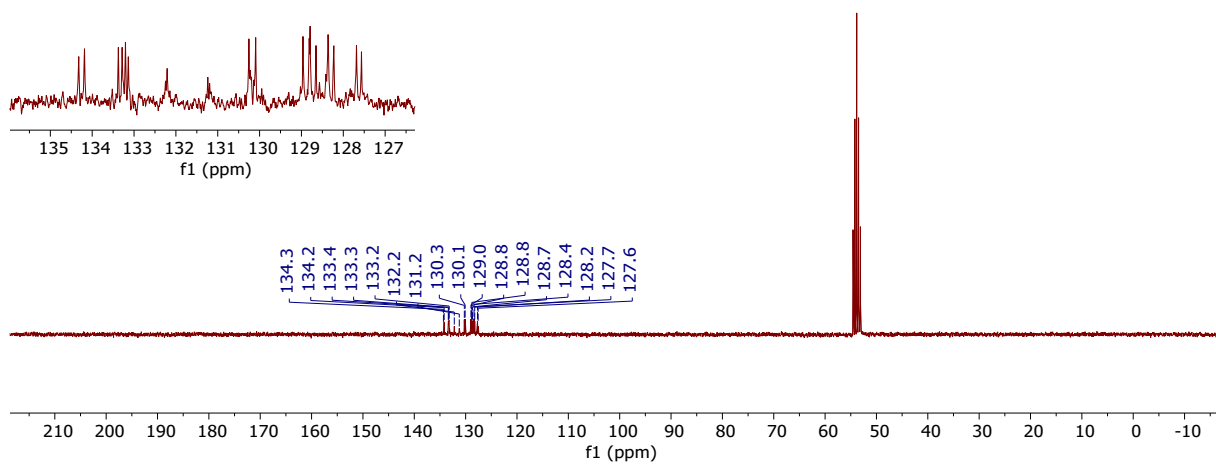

Figure S 20.  $^{13}\text{C}$  NMR (298 K,  $\text{CD}_2\text{Cl}_2$ , 101 MHz) spectrum of 5.

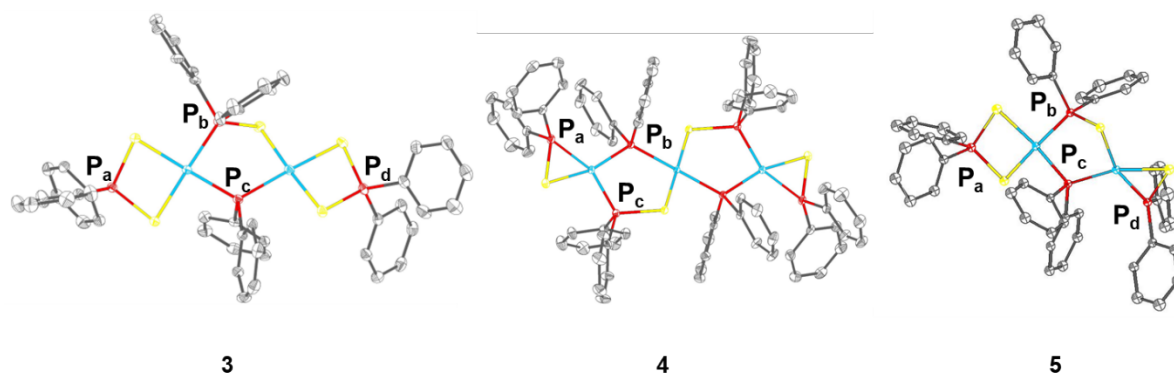

Figure S 21. Naming scheme for the assignment of the signals in compounds 3, 4, 5 in  $^{31}\text{P}\{^1\text{H}\}$  NMR spectra.

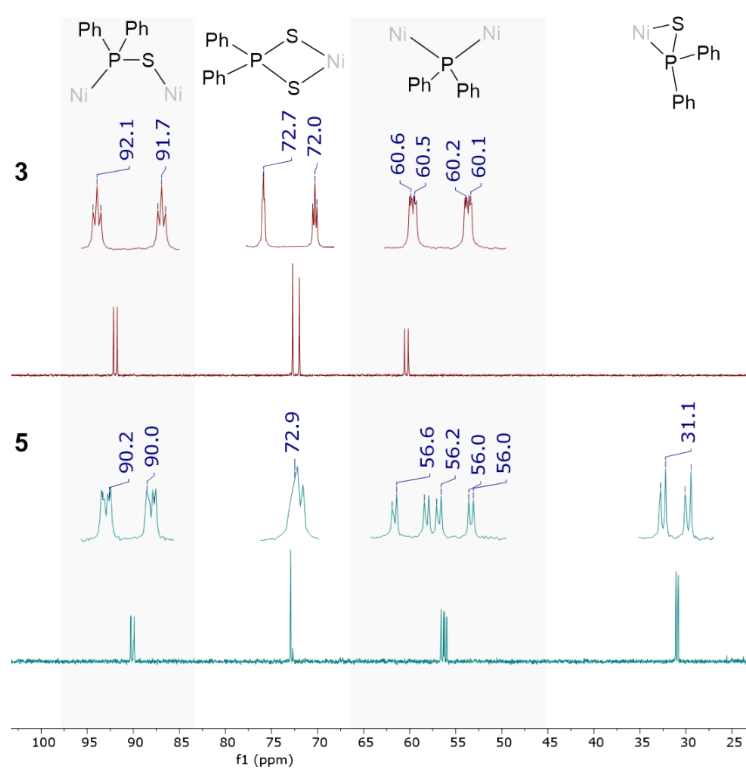

Figure S 22.  $^{31}\text{P}\{^1\text{H}\}$  NMR (298 K,  $\text{CD}_2\text{Cl}_2$ , 162 MHz) spectra of 3 and 5 and assignment of the signals.

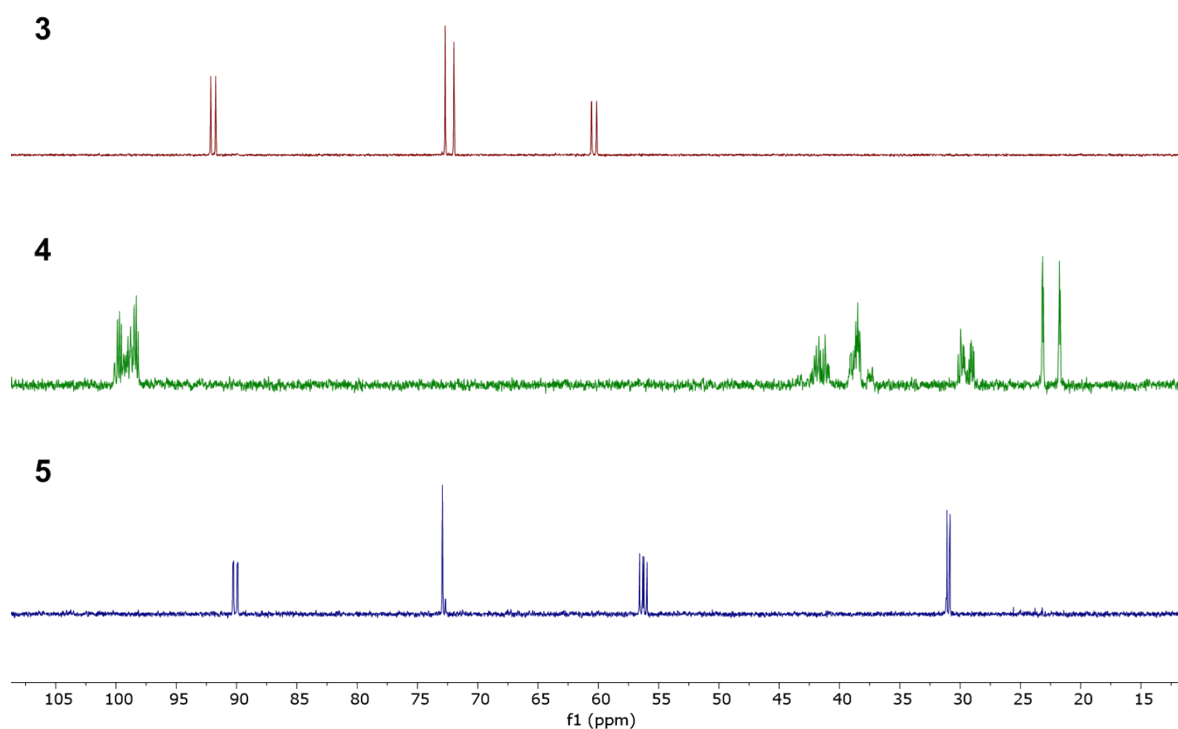

Figure S 23. Comparison of the  $^{31}\text{P}\{^1\text{H}\}$  NMR (298 K,  $\text{CD}_2\text{Cl}_2$  (3, 5) or  $\text{CDCl}_3$  (4), 162 MHz) spectra for the assignment of the phosphorus-based signals.

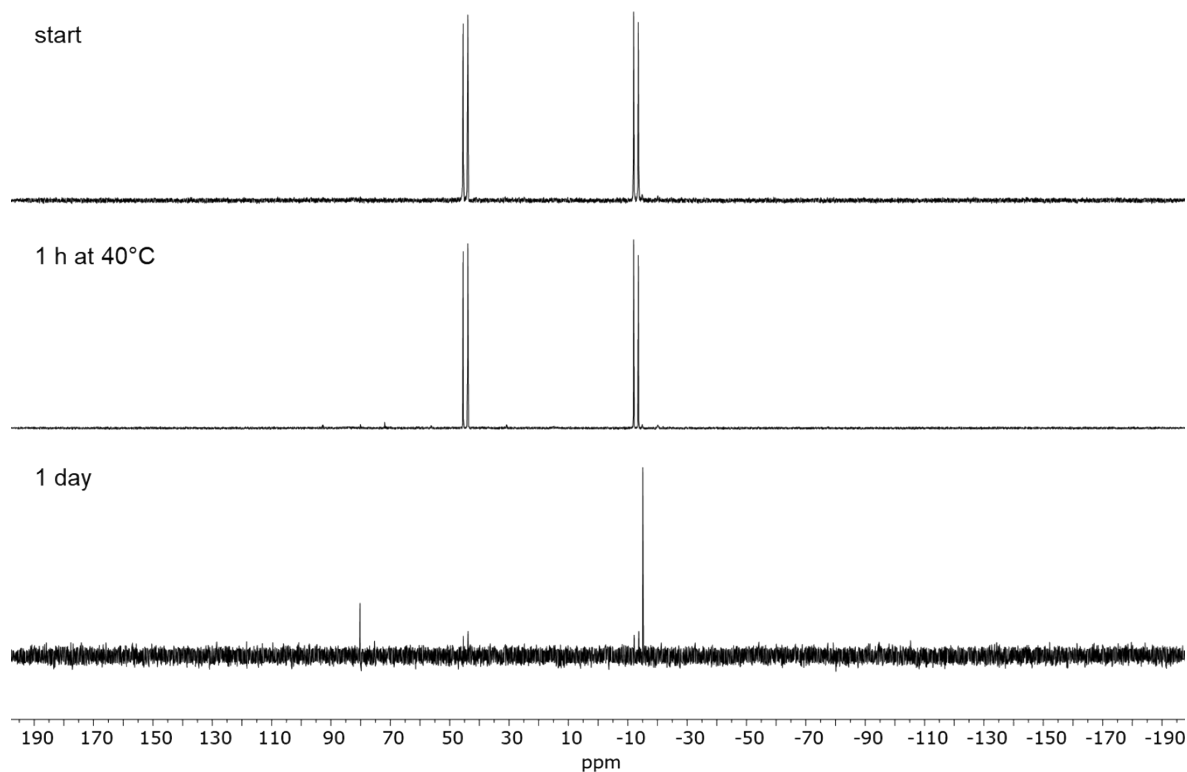

Figure S 24.  $^{31}\text{P}\{^1\text{H}\}$  NMR (298 K,  $\text{CD}_2\text{Cl}_2$ , 162 MHz) of the NMR scale reaction of  $[\text{Ni}(\text{COD})_2]$  and PPS. At the start of the reaction and after heating to  $40^\circ\text{C}$  for 1 h, the unreacted PPS ligand is the only species that can be observed. After 1 day, the PPS ligand is consumed and  $\text{Ph}_2\text{P}-\text{PPh}_2$  is mainly detected, which stems from ligand rearrangement reactions yielding  $\text{Ph}_2\text{PSS}^-$ ,  $\text{Ph}_2\text{PS}^-$  and  $\text{Ph}_2\text{P}^-$ . In addition, trace amounts of an



unidentified species at 80.2 ppm can be observed. However, the formation of intermediate species of the synthesis of **4** cannot be tracked by NMR spectroscopy due to their paramagnetic character.

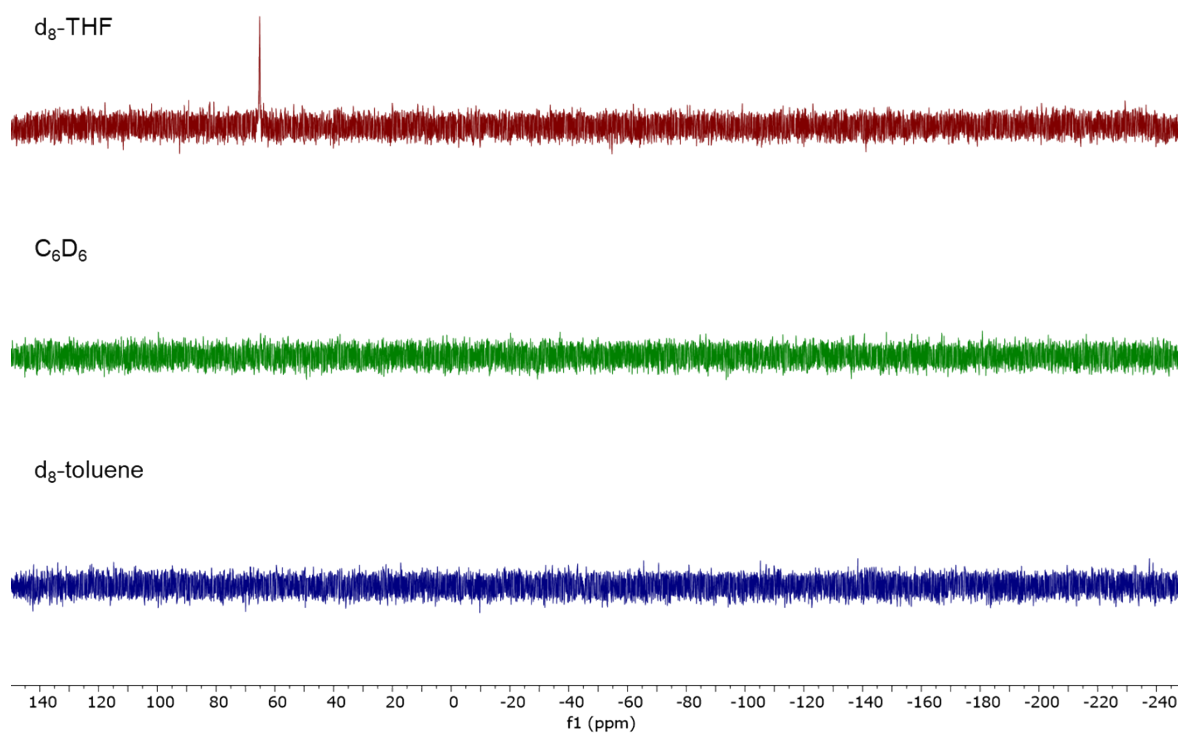

Figure S 25. Investigation of the solution behaviour of the reference catalyst  $[\text{NiBr}_2(\text{dppe})]$  in  $\text{d}_8\text{-thf}$ ,  $\text{C}_6\text{D}_6$  and  $\text{d}_8\text{-toluene}$  via  $^{31}\text{P}\{^1\text{H}\}$  NMR spectroscopy (298 K, 162 MHz). The compound is only sufficiently soluble in  $\text{d}_8\text{-thf}$  for the detection of NMR signals. No ligand dissociation can be identified.

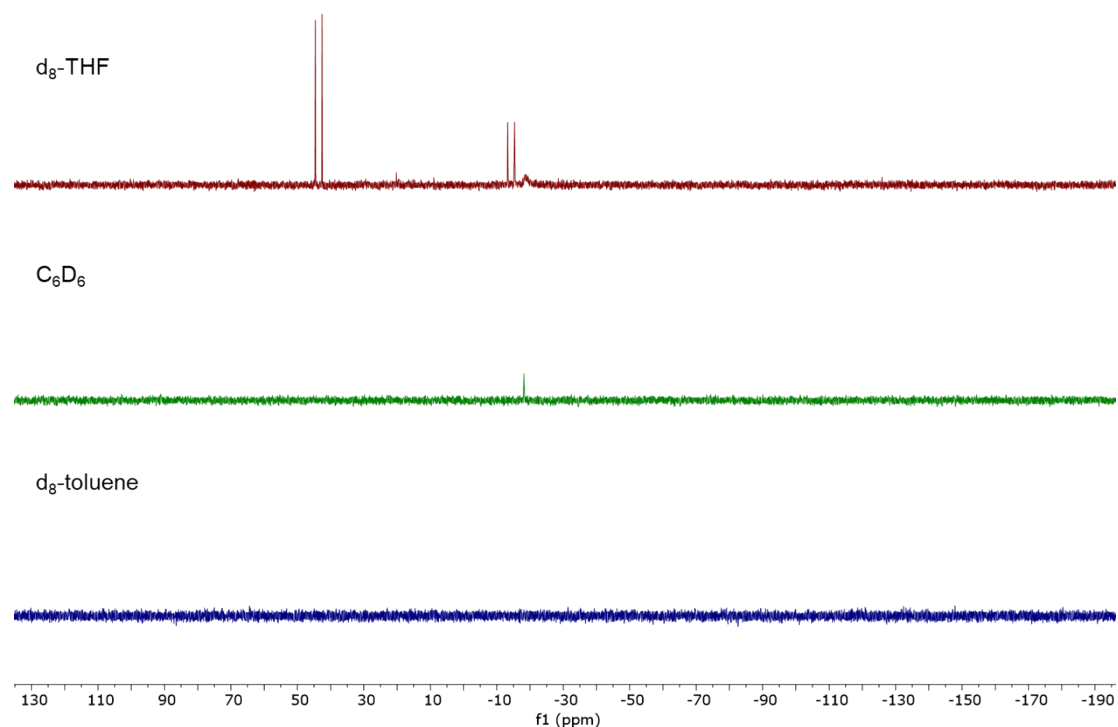

Figure S 26. Investigation of the solution behaviour of 1 in  $\text{d}_8\text{-thf}$ ,  $\text{C}_6\text{D}_6$  and  $\text{d}_8\text{-toluene}$  via  $^{31}\text{P}\{^1\text{H}\}$  NMR spectroscopy (298 K, 162 MHz). In  $\text{d}_8\text{-thf}$ , PPS ( $\delta = 43.9$  ppm, d,  $\text{P}=\text{S}$ ,  $^1J_{\text{PP}} = 247.3$  Hz;  $-14.0$  ppm, d,  $\text{PPh}_2$ ,  $^1J_{\text{PP}} = 247.3$  Hz) is liberated pointing towards the ligand substitution by THF, in  $\text{C}_6\text{D}_6$  only the signal of 1 is visible and in  $\text{d}_8\text{-toluene}$  no sufficient amount of compound can be dissolved.

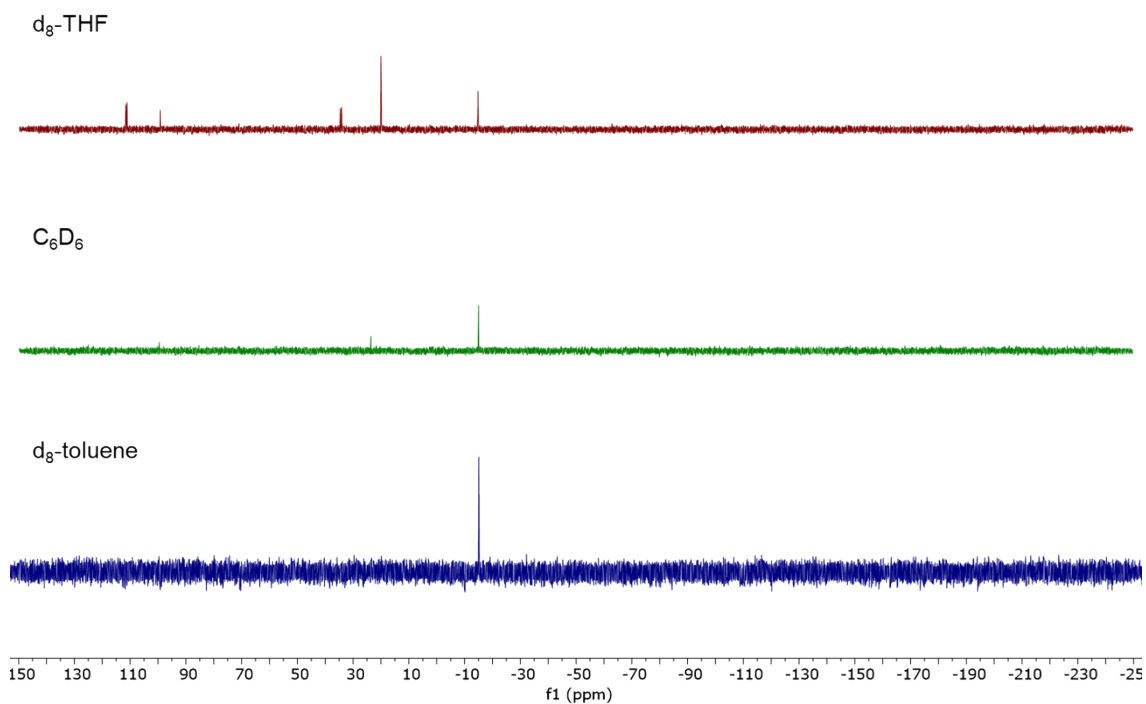

Figure S 27. Investigation of the solution behaviour of 2 in  $\text{d}_8\text{-thf}$ ,  $\text{C}_6\text{D}_6$  and  $\text{d}_8\text{-toluene}$  via  $^{31}\text{P}\{^1\text{H}\}$  NMR spectroscopy (298 K, 162 MHz). In  $\text{d}_8\text{-thf}$ , unlike with 1, no PPS is liberated. Instead, new compounds are formed, which reveal different environments of phosphorus (111.6 ppm (d, 51.5 Hz), 99.5 ppm (s), 34.7 ppm (d, 51.5 Hz), 20.3 ppm (s),  $-14.5$  ppm (s, 2) through association of thf. Hereby it is likely that the coordination

of thf causes a shift of the PSP tautomeric form to the PPS tautomeric form. In  $C_6D_6$  mainly the signal of 2 is visible and slight amounts of similar compounds as in  $d_8$ -thf. In  $d_8$ -toluene 2 can be dissolved.

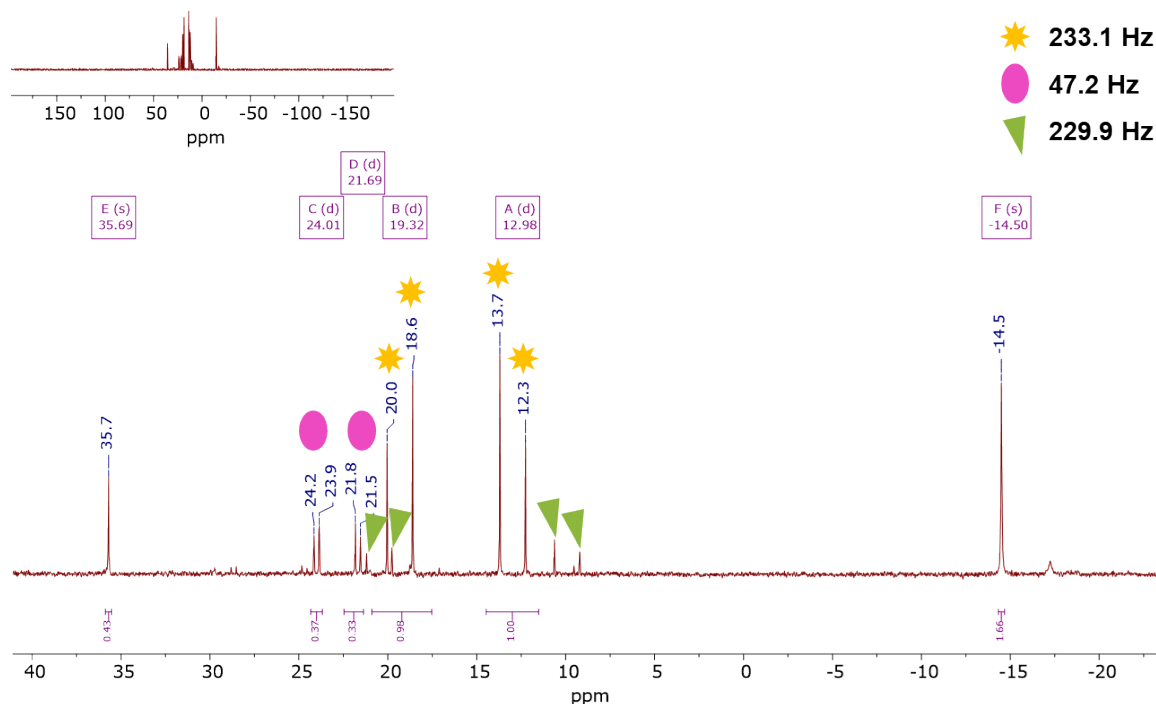

**Figure S 28.** Conversion of 2 with 2 eq. of MesMgBr in CDCl<sub>3</sub> tracked using <sup>31</sup>P{<sup>1</sup>H} NMR spectroscopy (298 K, 162 MHz). Besides the consumption of 2 (−14.5 ppm), new compounds are formed, which result in several doublets of doublets. The signals are highly likely stemming from [Ni(Mes)(PSP)] and complexes containing the PPS tautomer of the ligand coordinated to Ni(II) or Ni(0). An analogue behaviour is observed with 1 eq. and 2 eq. of MesMgBr in CDCl<sub>3</sub> and toluene, whereby an increased consumption of 2 is achieved with a larger quantity of MesMgBr and better solubility in CDCl<sub>3</sub> compared to toluene. It should be noted that no liberated PPS ligand can be observed.

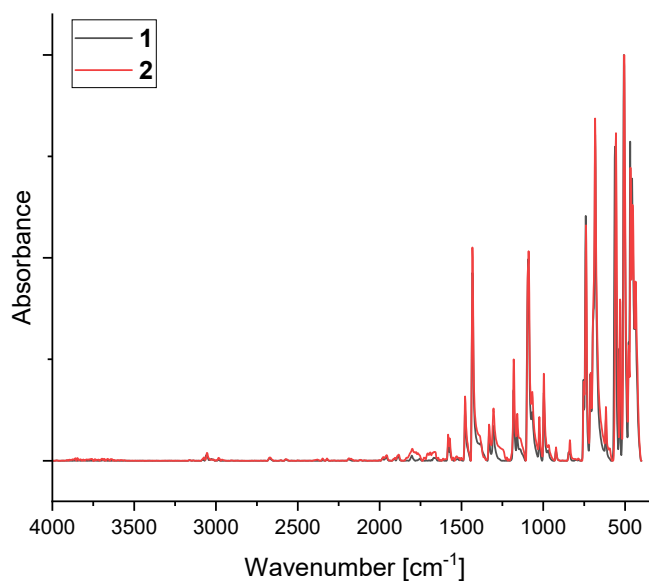

**Figure S 29.** Normalized IR spectra of 1 and 2, recorded at 298 K in nitrogen.

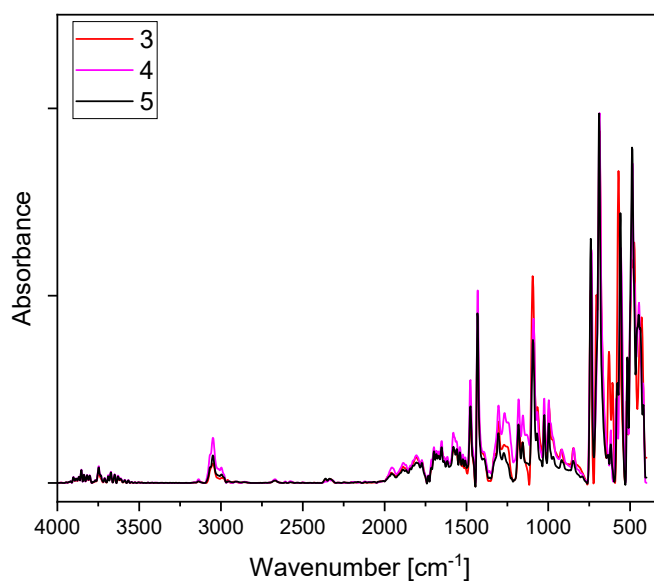

Figure S 30. Normalized IR spectra of 3, 4 and 5, recorded at 298 K in nitrogen.

### 3. Single-crystal X-ray crystallography

Table S 1: Crystallographic parameters of the complexes 1–5.

|                           | <b>1</b>                        | <b>2</b>                      | <b>3</b>                       | <b>4 · DCM</b>                     | <b>5 · 1 toluene<br/>· 1 n-pentane</b> |
|---------------------------|---------------------------------|-------------------------------|--------------------------------|------------------------------------|----------------------------------------|
| CCDC No.                  | 2375582                         | 2375583                       | 2375585                        | 2375584                            | 2375581                                |
| Formulae                  | $C_{24}H_{20}SP_2NiBr$<br>$r_2$ | $C_{24}H_{20}SP_2Ni$<br>$I_2$ | $C_{48}H_{40}S_5P_4$<br>$Ni_2$ | $C_{74}H_{46}S_4P_6Ni_3$<br>$Cl_4$ | $C_{108}H_{100}S_8P_8$<br>$Ni_4$       |
| Formula mass              | 620.93                          | 714.91                        | 1018.40                        | 1585.24                            | 2136.96                                |
| Crystal system            | monoclinic                      | Monoclinic                    | triclinic                      | monoclinic                         | triclinic                              |
| Space group               | $P2_1/n$                        | $I2$                          | $P\bar{1}$                     | $P2_1/n$                           | $P\bar{1}$                             |
| T [K]                     | 180                             | 150                           | 180                            | 180                                | 100                                    |
| a [Å]                     | 8.6617(4)                       | 11.983(10)                    | 13.7840(4)                     | 12.1053(5)                         | 13.2596(3)                             |
| b [Å]                     | 14.1619(5)                      | 7.826(4)                      | 16.4338(5)                     | 13.2856(4)                         | 20.2572(6)                             |
| c [Å]                     | 19.4168(11)                     | 14.014(12)                    | 21.9103(7)                     | 22.4508(9)                         | 20.9388(6)                             |
| $\alpha$ [°]              | 90                              | 90                            | 93.043(2)                      | 90                                 | 115.888(2)                             |
| $\beta$ [°]               | 92.730(4)                       | 108.88(4)                     | 96.228(2)                      | 96.619(3)                          | 99.709(2)                              |
| $\gamma$ [°]              | 90                              | 90                            | 110.795(2)                     | 90                                 | 90.394(2)                              |
| V [Å <sup>3</sup> ]       | 2379.08(19)                     | 1243.5(16)                    | 4590.0(2)                      | 3586.6(2)                          | 4966.7(2)                              |
| Z                         | 4                               | 2                             | 4                              | 2                                  | 2                                      |
| Radiation type            | Ga-K $\alpha$                   | Ga-K $\alpha$                 | Ga-K $\alpha$                  | Ga-K $\alpha$                      | Mo-K $\alpha$                          |
| $\mu$ [mm <sup>-1</sup> ] | 8.692                           | 19.034                        | 7.003                          | 6.946                              | 1.092                                  |
| No. of reflections        | 15738                           | 6318                          | 59741                          | 40865                              | 73285                                  |

|                                             |        |        |        |        |        |
|---------------------------------------------|--------|--------|--------|--------|--------|
| measured                                    |        |        |        |        |        |
| No. of independent reflections              | 5261   | 1900   | 18781  | 8653   | 24081  |
| $R_{\text{int}}$                            | 0.0219 | 0.0540 | 0.0397 | 0.0266 | 0.0932 |
| Final $R_1$ values ( $I > 2\sigma(I)$ )     | 0.0276 | 0.0387 | 0.0374 | 0.0319 | 0.0455 |
| Final $wR(F^2)$ values ( $I > 2\sigma(I)$ ) | 0.0714 | 0.1099 | 0.0728 | 0.0720 | 0.1178 |
| Final $R_1$ values (all data)               | 0.0318 | 0.0387 | 0.0797 | 0.0439 | 0.0659 |
| Final $wR(F^2)$ values (all data)           | 0.0732 | 0.1099 | 0.0815 | 0.0768 | 0.1294 |
| Goodness of fit on $F^2$                    | 1.044  | 1.066  | 0.890  | 1.026  | 1.023  |

#### 4. Structural parameters

Table S 2. Selected bond lengths [Å], angles [°] and structural parameters of 1 and 2 in the solid-state.

|                                     | [NiBr <sub>2</sub> (PSP)] (1) | [NiI <sub>2</sub> (PSP)] (2) |
|-------------------------------------|-------------------------------|------------------------------|
| P–S                                 | 2.1146(7)–2.1183(7)           | 2.117(3)                     |
| P–Ni                                | 2.1347(6)–2.1425(6)           | 2.137(3)                     |
| Ni–X                                | 2.3271(4)–2.3370(4)           | 2.5251(7)                    |
| P–C                                 | 1.799(2)–1.812(2)             | 1.814(6)–1.816(7)            |
| X–Ni–X                              | 97.234(13)                    | 100.57(8)                    |
| X–Ni–P                              | 91.613(19)–171.07(2)          | 89.93(7)–167.36(6)           |
| Ni–P–S                              | 99.43(3)–99.80(3)             | 98.93(10)                    |
| P–S–P                               | 80.81(3)                      | 81.51(15)                    |
| P–Ni–P                              | 79.80(2)                      | 80.62(13)                    |
| Distance Ni–best plane <sup>a</sup> | 0.008                         | 0.000                        |
| $\tau'_4$ <sup>b</sup>              | 0.13                          | 0.18                         |

<sup>a</sup> The best plane is defined by the two P-atoms of the PSP ligand and two halides; distance to this plane is given in Å; <sup>b</sup> Structural index parameter<sup>10</sup>:  $\tau'_4 [-] = ((\beta - \alpha)/(360 - \theta)) + ((180 - \beta)/(180 - \theta))$ ,  $\beta, \alpha$ : largest valence angles  $\beta > \alpha$ ,  $\theta$ : tetrahedral angle  $\cos^{-1}(-1/3) \sim 109.47^\circ$ ;  $\tau'_4 \sim 0$  for square planar and  $\tau'_4 \sim 1$  for tetrahedral coordination

**Table S 3. Selected bond lengths [Å] in the different ligands (Ph<sub>2</sub>PS<sup>-</sup>, Ph<sub>2</sub>PSS<sup>-</sup> and Ph<sub>2</sub>P<sup>-</sup>) of the multinuclear Ni complexes 3, 4 and 5.**

| Compound | Ligand                                       | P–S                       | P–Ni                                 | S–Ni                    |
|----------|----------------------------------------------|---------------------------|--------------------------------------|-------------------------|
| <b>3</b> | Ph <sub>2</sub> PS <sub>2</sub> <sup>-</sup> | 1.9949(11)–<br>2.0176(10) | 2.8200(8)–<br>2.8385(8) <sup>a</sup> | 2.2311(9)–<br>2.2826(8) |
| <b>5</b> | Ph <sub>2</sub> PS <sub>2</sub> <sup>-</sup> | 2.0084(10)–<br>2.0086(10) | 2.8208(7) <sup>a</sup>               | 2.2428(7)–<br>2.2664(8) |
| <b>3</b> | Ph <sub>2</sub> PS <sup>-</sup> (intern.)    | 2.0357(10)–<br>2.0394(10) | 2.1448(9)–<br>2.1467(8)              | 2.1784(9)–<br>2.1900(9) |
| <b>4</b> | Ph <sub>2</sub> PS <sup>-</sup> (term.)      | 2.0246(7)                 | 2.1477(5)                            | 2.2102(5)               |
| <b>4</b> | Ph <sub>2</sub> PS <sup>-</sup> (intern.)    | 2.0616(6)                 | 2.1353(5)                            | 2.1739(4)               |
| <b>5</b> | Ph <sub>2</sub> PS <sup>-</sup> (term.)      | 2.0064(10)                | 2.0962(7)                            | 2.2498(7)               |
| <b>5</b> | Ph <sub>2</sub> PS <sup>-</sup> (intern.)    | 2.0421(9)                 | 2.1642(7)                            | 2.2078(7)               |
| <b>3</b> | Ph <sub>2</sub> P <sup>-</sup>               | -                         | 2.1999(8)–<br>2.2045(8)              | -                       |
| <b>4</b> | Ph <sub>2</sub> P <sup>-</sup>               | -                         | 2.1844(5);<br>2.2711(4)              | -                       |
| <b>5</b> | Ph <sub>2</sub> P <sup>-</sup>               | -                         | 2.1665(7);<br>2.1915(7)              | -                       |

<sup>a</sup> Atom–Atom distance, no direct bond

**Table S 4. Classification of the coordination environments in 3-5 based on the distance of the Ni(II) atoms to the best plane [Å] and on the structural index parameter  $\tau'_4$  [-]**

|                                     | <b>3</b>    | <b>4</b>                 | <b>5</b>                 |
|-------------------------------------|-------------|--------------------------|--------------------------|
| Distance Ni–best plane <sup>a</sup> | 0.003–0.079 | 0.000–0.099 <sup>c</sup> | 0.001–0.056 <sup>d</sup> |
| $\tau'_4$ <sup>b</sup>              | 0.03–0.10   | 0.000–0.24 <sup>c</sup>  | 0.13–0.27 <sup>d</sup>   |

<sup>a</sup> The best plane is defined by the four coordinating P and S atoms of the ligands; <sup>b</sup> Structural index parameter<sup>10</sup>:  $\tau'_4$  [-] =  $((\beta-\alpha)/(360-\theta)) + ((180-\beta)/(180-\theta))$ ,  $\beta, \alpha$ : largest valence angles  $\beta > \alpha$ ,  $\theta$ : tetrahedral angle  $\cos^{-1}(-1/3) \sim 109.47^\circ$ ;  $\tau'_4 \sim 0$  for square planar and  $\tau'_4 \sim 1$  for tetrahedral coordination <sup>c</sup> the central Ni atom shows an ideal square planar geometry whereas the outer two Ni atoms show larger deviations induced by the coordination of the terminal Ph<sub>2</sub>PS<sup>-</sup> ligand <sup>d</sup> the terminal Ph<sub>2</sub>PS<sup>-</sup> ligand again results in a decreased ideal square planar geometry while for the Ni atom coordinated by the terminal Ph<sub>2</sub>PSS<sup>-</sup> ligand smaller deviations from the ideal square planar geometry can be obtained

## 5. Literature comparison of ligands

**Table S 5.** PSP-containing literature reported transition metal chelate complexes with selected bond lengths (Å) and angles (°).

| Compound | P–S                   | P–M                   | P–S–P    | P–M–P    | Reference |
|----------|-----------------------|-----------------------|----------|----------|-----------|
|          | 2.131(3)              | 2.489(2)              | 86.9(1)  | 72.02(7) | 11        |
|          | 2.126(6)–<br>2.145(6) | 2.278(4)–<br>2.288(4) | 82.1(2)  | 75.8(2)  | 12        |
|          | 2.126(4)–<br>2.136(4) | 2.302(2)–<br>2.315(2) | 82.19(9) | 74.71(6) | 12        |
|          | 2.123(4)–<br>2.135(4) | 2.299(2)–<br>2.306(2) | 82.46(9) | 74.90(6) | 12        |

**Table S 6.** Literature reported transition metal complexes with Ph<sub>2</sub>PS<sup>–</sup>, Ph<sub>2</sub>P<sup>–</sup> and Ph<sub>2</sub>PSS<sup>–</sup> ligands and selected bond lengths (Å).

| Compound | Ligand                           | P–S                     | P–Ni                    | S–Ni                    | Reference |
|----------|----------------------------------|-------------------------|-------------------------|-------------------------|-----------|
|          | Ph <sub>2</sub> PS <sup>–</sup>  | 2.0600(7)–<br>2.0648(7) | 2.1440(6)–<br>2.1555(6) | 2.1979(5)–<br>2.1986(6) | 13,14     |
|          | Ph <sub>2</sub> PSS <sup>–</sup> | 2.006(8)–<br>2.022(8)   | -                       | 2.234(5)–<br>2.242(6)   | 15        |
|          | Ph <sub>2</sub> PSS <sup>–</sup> | 1.993(6)–<br>2.013(6)   | -                       | 2.482(4)–<br>2.523(3)   | 16        |
|          | Ph <sub>2</sub> P <sup>–</sup>   | -                       | 2.153–2.156             | -                       | 17        |
|          | Ph <sub>2</sub> P <sup>–</sup>   | -                       | 2.173(1)–<br>2.184(1)   | -                       | 18        |

## 6. Catalytic tests

Table S 7. Catalytic test results using **1**, **2** or [NiBr<sub>2</sub>(dppe)] (ref) as catalysts in the coupling reaction of aryl halides and Grignard reagents. Reaction conditions: aryl halide (1 eq.) and Grignard reagent (1 eq.) are reacted in the named solvents for 20 h at room temperature. The conversions of aryl halides were determined by GC-MS using *n*-decane as internal standard.

|                                                                                     |            | Conversion [%] |                               |      | Selectivity [%] |                               |      |
|-------------------------------------------------------------------------------------|------------|----------------|-------------------------------|------|-----------------|-------------------------------|------|
|                                                                                     |            | THF            | C <sub>6</sub> D <sub>6</sub> | Tol. | THF             | C <sub>6</sub> D <sub>6</sub> | Tol. |
| 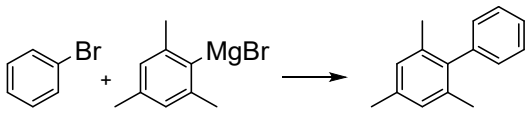   | <b>1</b>   | 45             | 26                            | 63   | 100             | 100                           | 100  |
|                                                                                     | <b>2</b>   | 48             | 14                            | 52   | 100             | 100                           | 100  |
|                                                                                     | <b>ref</b> | 74             | 0                             | 14   | 100             | -                             | 100  |
|    | <b>1</b>   | 39             | 69                            | 75   | 50              | 90                            | 91   |
|                                                                                     | <b>2</b>   | 28             | 75                            | 82   | 63              | 95                            | 86   |
|                                                                                     | <b>ref</b> | 20             | 29                            | 53   | 61              | 100                           | 100  |
|   | <b>1</b>   | 58             | 40                            | 50   | 100             | 100                           | 94   |
|                                                                                     | <b>2</b>   | 45             | 46                            | 49   | 100             | 100                           | 85   |
|                                                                                     | <b>ref</b> | 72             | 73                            | 62   | 100             | 100                           | 100  |
|  | <b>1</b>   | 84             | 46                            | 79   | 55              | 78                            | 72   |
|                                                                                     | <b>2</b>   | 76             | 20                            | 77   | 63              | 84                            | 79   |
|                                                                                     | <b>ref</b> | 84             | 42                            | 86   | 95              | 94                            | 92   |



**Table S 8.** Catalytic results using **1**, **2** or the reference catalyst ("ref") [NiBr<sub>2</sub>(dppe)] for C(sp<sup>2</sup>)-C(sp<sup>2</sup>) couplings with sterically demanding arylbromides. Reactions were carried out with 10 mol% catalyst at room temperature for 20 h in toluene.

|                                                                                   |            | Conversion<br>[%] | Selectivity<br>[%] |
|-----------------------------------------------------------------------------------|------------|-------------------|--------------------|
| 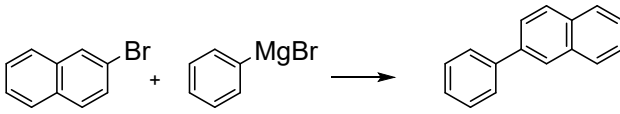 | <b>1</b>   | 91                | 100                |
|                                                                                   | <b>2</b>   | 80                | 100                |
|                                                                                   | <b>ref</b> | 90                | 88                 |
|  | <b>1</b>   | 78                | 100                |
|                                                                                   | <b>2</b>   | 92                | 100                |
|                                                                                   | <b>ref</b> | 8                 | 100                |

**Table S 9.** Catalytic results using **1**, **2** or the reference catalyst ("ref") [NiBr<sub>2</sub>(dppe)] for C(sp<sup>2</sup>)-C(sp<sup>3</sup>) couplings. Reactions were carried out with 10 mol% catalyst at room temperature for 20 h in toluene.

|                                                                                     |            | Conversion<br>[%] | Selectivity<br>[%] |
|-------------------------------------------------------------------------------------|------------|-------------------|--------------------|
| 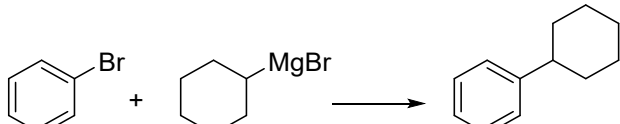 | <b>1</b>   | 65                | 75                 |
|                                                                                     | <b>2</b>   | 73                | 90                 |
|                                                                                     | <b>ref</b> | 86                | 84                 |
|  | <b>1</b>   | 70                | 93                 |
|                                                                                     | <b>2</b>   | 73                | 95                 |
|                                                                                     | <b>ref</b> | 100               | 100                |

## 7. Computational details

All calculations were carried out using the ORCA 5.0.3 package in the gas phase.<sup>19,20</sup> For all ORCA calculations, atom-pairwise dispersion corrections with the Becke-Johnson damping scheme (D3BJ) were utilised.<sup>21,22</sup> Density fitting techniques, also called resolution-of-identity approximation (RI), were used for the GGA calculations.

Geometry optimisations and frequency analyses, to confirm the absence of any imaginary frequencies, were carried out at the TPSS<sup>23,24</sup>/def2-TZVP<sup>25,26</sup> level of theory. The geometry optimisations of **1** and **2** are based on the coordinates obtained from the crystal structure. Time-dependent density functional theory (TD-DFT)<sup>27</sup> calculations at the TPSS<sup>23,24</sup>/def2-TZVP<sup>25,26</sup> level of theory were utilised to investigate the underlying electronic transitions. For plotting the spectra, the orca\_mapspc programme was used with a 2500 cm<sup>-1</sup> line broadening for the UV/Vis spectra. For the generation of the calculated IR spectra, also the orca\_mapspc programme was used. For the plot of the difference densities the orca\_plot programme was used.

**Table S 10.** Löwdin charges from Löwdin population analysis. Level of theory: TPSS, def2-TZVP. dppm = Methylenebis(diphenylphosphane)

|     | [NiBr <sub>2</sub> (PSP)]<br>(1) | [NiI <sub>2</sub> (PSP)]<br>(2) | [NiBr <sub>2</sub> (dppm)] | [NiI <sub>2</sub> (dppm)] |
|-----|----------------------------------|---------------------------------|----------------------------|---------------------------|
| Ni  | -0.939615                        | -0.990836                       | -1.045391                  | -0.998144                 |
| P   | 0.629128,<br>0.628393            | 0.641930,<br>0.643324           | 0.771001,<br>0.822381      | 0.765617,<br>0.814405     |
| Hal | 0.005878,<br>0.012959            | 0.025712,<br>0.048805           | 0.084350,<br>0.080942      | 0.073791,<br>0.076647     |

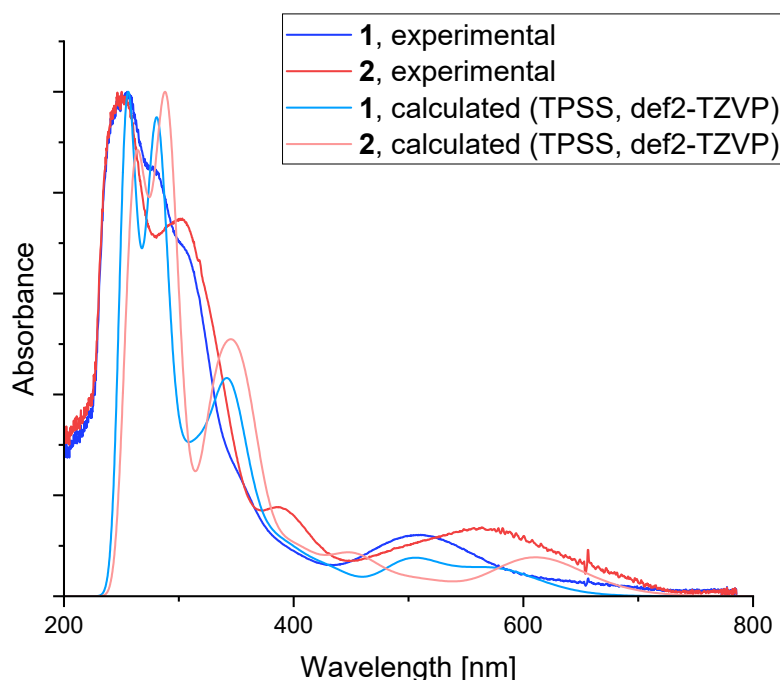

**Figure S 31.** TD-DFT calculated UV/Vis spectra of **1** and **2** (level of theory: TPSS, def2-TZV) together with the experimentally obtained spectra DCM solutions ( $c = 1 \cdot 10^{-4} \text{ mol L}^{-1}$ ).

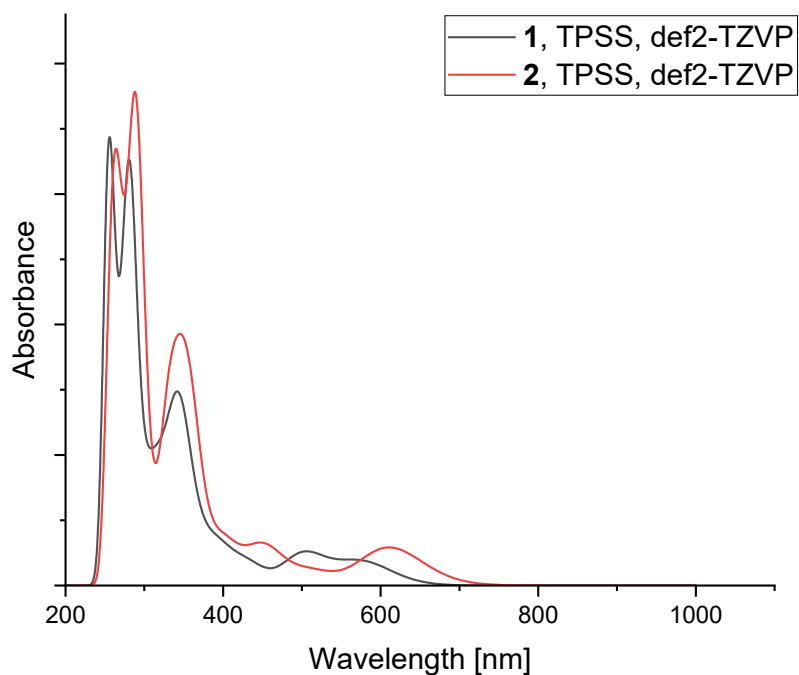

Figure S 32. TD-DFT calculated UV/Vis spectra of **1** and **2** (level of theory: TPSS, def2-TZVP).

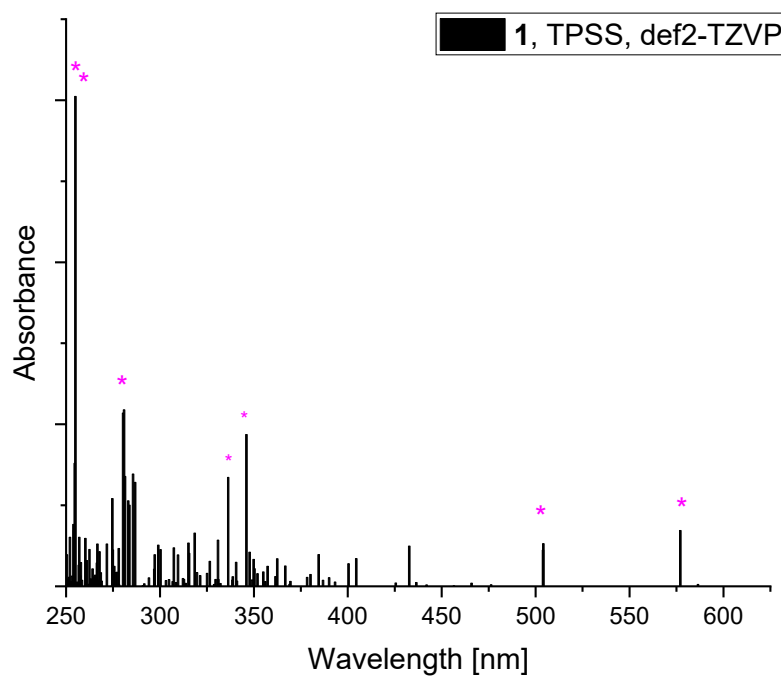

Figure S 33. TD-DFT calculated UV/Vis spectrum of **1** indicated by the respective oscillator strengths (level of theory: TPSS, def2-TZVP). Transitions with high oscillator strengths are highlighted and evaluated with respect to their difference density in Table S 10.

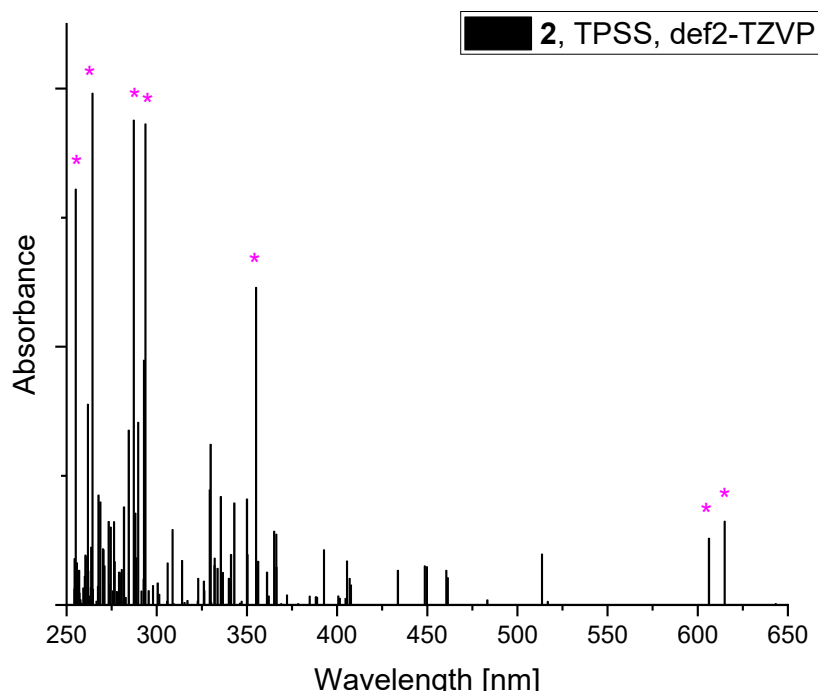

Figure S 34. TD-DFT calculated UV/Vis spectrum of **2** indicated by the respective oscillator strengths (level of theory: TPSS, def2-TZVP). Transitions with high oscillator strengths are highlighted and evaluated with respect to their difference density in Table S 11.

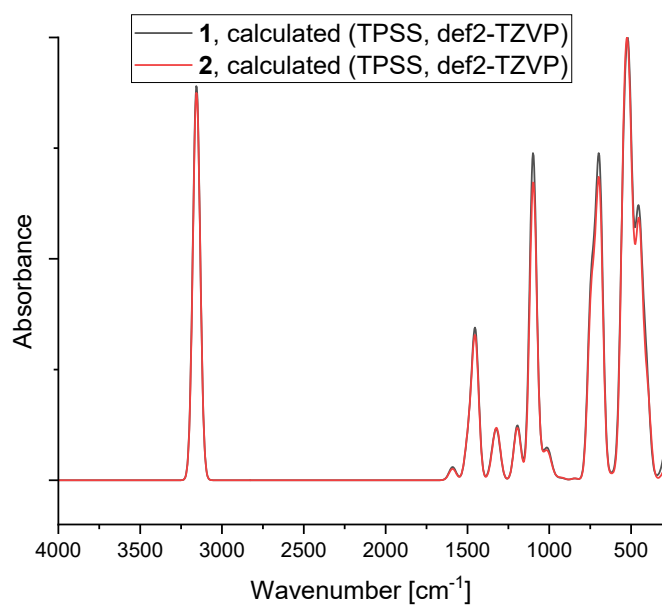

Figure S 35. Normalized calculated IR spectra of **1** and **2** (level of theory: TPSS, def2-TZVP).

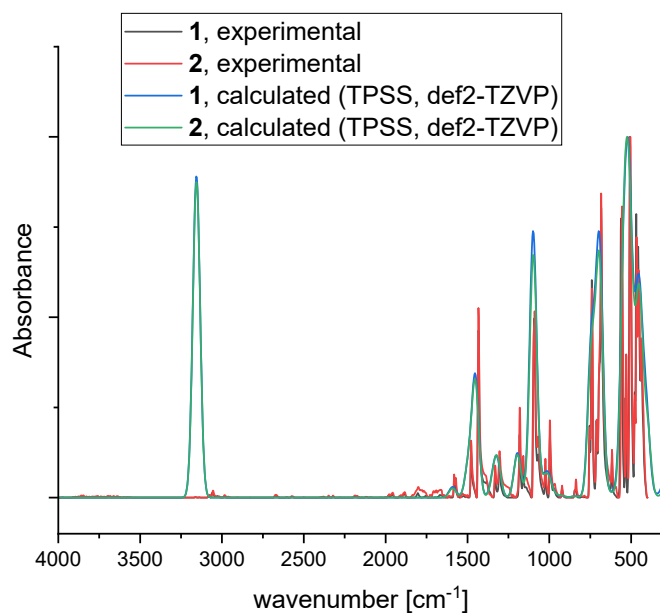

Figure S 36. Comparison of the normalized experimental and calculated IR spectra of 1 and 2 (level of theory: TPSS, def2-TZV). A systematic blueshift of the frequencies is observed.

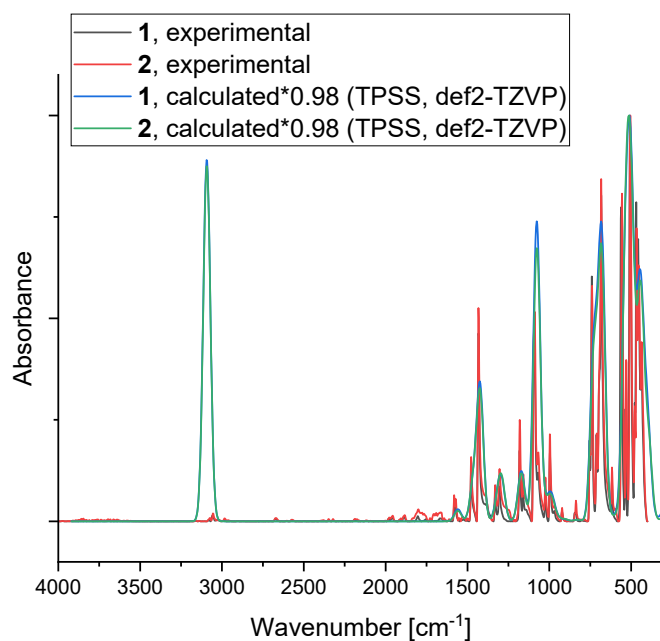

Figure S 37. Comparison of the normalized experimental and calculated IR spectra of 1 and 2 (level of theory: TPSS, def2-TZV). To counterbalance the commonly observed blue-shift of DFT functionals, the obtained energies were scaled using a scaling factor of 0.98. This scaling factor aligns very well with reported scaling factors for the DFT calculation of ground state harmonic vibrational frequencies.<sup>28</sup>

**Table S 11.** Difference densities obtained for **1** from TD-DFT calculations, including the calculated wavelengths and oscillator strengths of the respective transitions. Transitions proceed from blue to red. Level of theory: TPPS, def2-TZVP, surface iso values =  $\pm 0.001$ .

|                                                                                                                                                                                                                         |                                                                                                                                    |
|-------------------------------------------------------------------------------------------------------------------------------------------------------------------------------------------------------------------------|------------------------------------------------------------------------------------------------------------------------------------|
| 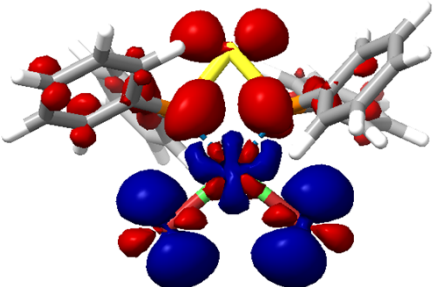 <p>Transition 2<br/>577 nm, 0.015880425<br/>HOMO-1 (73% Ni, 15 % Br) <math>\rightarrow</math> LUMO (38% Ni, 20% P and S, 14 % Br)</p> |  <p>Transition 33<br/>346 nm, 0.043180516</p>    |
|  <p>Transition 38<br/>336 nm, 0.031001622</p>                                                                                         |  <p>Transition 72<br/>281 nm, 0.031247648</p>   |
|  <p>Transition 73<br/>281 nm, 0.050212312</p>                                                                                        |  <p>Transition 104<br/>255 nm, 0.139345570</p> |
|  <p>Transition 105<br/>254 nm, 0.035033091</p>                                                                                       |                                                                                                                                    |

**Table S 12.** Difference densities obtained for **2** from TD-DFT calculations, including the calculated wavelengths and oscillator strengths of the respective transitions. Transitions proceed from blue to red. Level of theory: TPPS, def2-TZVP, surface iso values =  $\pm 0.001$ .

|                                                                                                                                                                                                                    |                                                                                                                                                                                                              |
|--------------------------------------------------------------------------------------------------------------------------------------------------------------------------------------------------------------------|--------------------------------------------------------------------------------------------------------------------------------------------------------------------------------------------------------------|
| 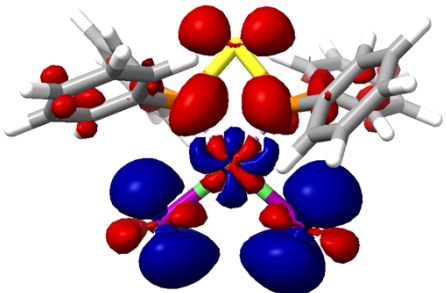 <p>Transition 2<br/>615 nm, 0.014931428<br/>HOMO-2 (80% Ni, 7% I) <math>\rightarrow</math> LUMO (35% Ni, 17% P and S, 18% I)</p> |  <p>Transition 3<br/>606 nm, 0.011868699<br/>HOMO-1 (80% I) <math>\rightarrow</math> LUMO (35% Ni, 17% P and S, 18% I)</p> |
|  <p>Transition 35<br/>355 nm, 0.056656899</p>                                                                                    |  <p>Transition 39<br/>346 nm, 0.000285545</p>                                                                             |
|  <p>Transition 69<br/>293 nm, 0.085849947</p>                                                                                   |  <p>Transition 76<br/>287 nm, 0.086533368</p>                                                                            |
|  <p>Transition 101<br/>264 nm, 0.091335981</p>                                                                                  |  <p>Transition 118<br/>225 nm, 0.074201486</p>                                                                           |

## 8. References

1. Stoe&Cie, *Journal*, 2005, X-RED, Program for data reduction and absorption correction, X-RED, Program for data reduction and absorption correction.
2. G. M. Sheldrick, *Acta. Cryst. A*, 2015, **71**, 3-8.
3. G. M. Sheldrick, *Acta. Cryst. B*, 2015, **71**, 3-8.
4. L. J. Farrugia, *J. Appl. Crystallogr.*, 2012, **45**, 849-854.
5. K. Brandenburg and M. Berndt, *Journal*, 1999, Diamond - Crystal and Molecular Structure Visualization.
6. C. J. Ballhausen and A. D. Liehr, *J. Am. Chem. Soc.*, 1959, **81**, 538-542.
7. O. A. Qamar, C. Cong and H. Ma, *Dalton Trans.*, 2020, **49**, 17106-17114.
8. M. C. Browning, J. R. Mellor, D. J. Morgan, S. A. J. Pratt, L. E. Sutton and L. M. Venanzi, *J. Chem. Soc.*, 1962, 693-703.
9. W. Kläui, K. Schmidt, A. Bockmann, P. Hofmann, H. R. Schmidt and P. Stauffert, *J. Organomet. Chem.*, 1985, **286**, 407-418.
10. A. Okuniewski, D. Rosiak, J. Chojnacki and B. Becker, *Polyhedron*, 2015, **90**, 47-57.
11. F. A. Cotton, L. R. Falvello, M. Tomas, G. M. Gray and C. S. Krainhanzel, *Inorg. Chim. Acta*, 1984, **82**, 129-139.
12. P. E. Sues, A. J. Lough and R. H. Morris, *Chem. Commun.*, 2014, **50**, 4707-4710.
13. H.-K. Fun, S. Chantrapromma, I. A. Razak, Q.-F. Zhang and X.-Q. Xin, *Acta. Cryst. E*, 2001, **57**, m190-m191.
14. W. Kläui, W. Eberspach and R. Schwarz, *J. Organomet. Chem.*, 1983, **252**, 347-357.
15. P. Porta, A. Sgamellotti and N. Vinciguerra, *Inorg. Chem.*, 1968, **7**, 2625-2629.
16. P. Porta, A. Sgamellotti and N. Vinciguerra, *Inorg. Chem.*, 1971, **10**, 541-547.
17. J. M. Coleman and L. F. Dahl, *J. Am. Chem. Soc.*, 1967, **89**, 542-552.
18. S. Ataie and R. T. Baker, *Inorg. Chem.*, 2022, **61**, 19998-20007.
19. F. Neese, *WIREs Comput. Mol. Sci.*, 2017, **8**, e1327.
20. F. Neese, *WIREs Comput. Mol. Sci.*, 2011, **2**, 73-78.
21. S. Grimme, J. Antony, S. Ehrlich and H. Krieg, *J. Phys. Chem.*, 2010, **132**, 154104.
22. S. Grimme, S. Ehrlich and L. Goerigk, *J. Comp. Chem.*, 2011, **32**, 1456-1465.
23. V. N. Staroverov, G. E. Scuseria, J. Tao and J. P. Perdew, *J. Phys. Chem.*, 2004, **121**, 11507.
24. J. Tao, J. P. Perdew, V. N. Staroverov and G. E. Scuseria, *Phys. Rev. Lett.*, 2003, **91**, 146401-146404.
25. F. Weigend, *Phys. Chem. Chem. Phys.*, 2006, **8**, 1057-1065.
26. F. Weigend and R. Ahlrichs, *Phys. Chem. Chem. Phys.*, 2005, **7**, 3297-3305.
27. C. Adamo and D. Jacquemin, *Chem. Soc. Rev.*, 2013, **42**, 845-856.
28. D. O. Kashinski, G. M. Chase, R. G. Nelson, O. E. Di Nallo, A. N. Scales, D. L. VanderLey, E. F. C. Byrd, *J. Phys. Chem. A*, 2017, **121**, 11, 2265-2273.
